# Supplementary material for: Spatio-temporal variability in the distribution of ground-dwelling riparian spiders and their potential role in water-to-land energy transfer along Hong Kong forest streams
Source: PeerJ. 2015 Jul 28;3:e1134. doi: 10.7717/peerj.1134 (PMC4525688; doi:10.7717/peerj.1134)
Supplement: Data S1 [file peerj-03-1134-s002.xlsx]

## Sheet: terrestrial invertebrates
Season (1=wet, 2=dry)	Date	Location (1=TPK, 2=SM)	Transect	Sample	Order / Subclass	Family	Sp.	T / A	No.	Boat+DW	Boat WT	DW
1	2013-07-09	1	0	3	Isopoda				3	0.0719	0.0624	0.0095
1	2013-07-09	1	0	3	Blattodea				6	0.0767	0.0687	0.008
1	2013-07-09	1	0	3	Orthoptera	Gryllidae			7	0.079	0.0732	0.0058
1	2013-07-09	1	0	3	Araneae	Pisauridae	Hygropoda		2	0.0816	0.0537	0.0279
1	2013-07-09	1	0	3	Araneae	Amaurobiidae	Spider 12		3	0.0258	0.0248	0.001
1	2013-07-09	1	0	3	Araneae	Lycosidae	Pardosa sumatrana		1	0.0332	0.0314	0.0018
1	2013-07-09	1	0	3	Coleoptera	Carabidae			1	0.0645	0.0643	0.0002
1	2013-07-09	1	0	3	Coleoptera	Silphidae			1	0.0643	0.0643	0
1	2013-07-09	1	0	4	Araneae	Pisauridae	Dolomedes		1	0.1641	0.0698	0.0943
1	2013-07-09	1	0	4	Blattodea				3	0.0805	0.0764	0.0041
1	2013-07-09	1	0	4	Orthoptera	Gryllidae			2	0.0649	0.0643	0.0006
1	2013-07-09	1	0	4	Orthoptera	Tetragidae			1	0.073	0.0727	0.0003
1	2013-07-09	1	0	4	Araneae	Salticidae	Spider 9		3	0.0684	0.0667	0.0017
1	2013-07-09	1	0	4	Coleoptera	Staphylinidae			1	0.0721	0.0721	0
1	2013-07-09	1	0	4	Heteroptera				1	0.0732	0.073	0.0002
1	2013-07-09	1	0	4	Acari				1	0.078	0.0776	0.0004
1	2013-07-09	1	0	15	Blattodea				4	0.0803	0.0708	0.0095
1	2013-07-09	1	0	15	Orthoptera	Gryllidae			3	0.0513	0.0489	0.0024
1	2013-07-09	1	0	15	Hymenoptera	Formicidae			7	0.0504	0.0493	0.0011
1	2013-07-09	1	0	15	Coleoptera	Carabidae			1	0.0512	0.0451	0.0061
1	2013-07-09	1	0	15	Araneae	Lycosidae	Pardosa sumatrana		3	0.0799	0.078	0.0019
1	2013-07-09	1	0	24	Orthoptera	Gryllidae			2	0.0463	0.0461	0.0002
1	2013-07-09	1	0	24	Hymenoptera	Formicidae			3	0.0474	0.047	0.0004
1	2013-07-09	1	0	24	Araneae	Pisauridae	Hygropoda		1	0.0531	0.053	0.0001
1	2013-07-09	1	0	24	Coleoptera (larvae)				1	0.0505	0.0505	0
1	2013-07-09	1	0	36	Hymenoptera	Formicidae			8	0.0725	0.0717	0.0008
1	2013-07-09	1	0	36	Orthoptera	Gryllidae			4	0.0648	0.0587	0.0061
1	2013-07-09	1	0	36	Isopoda				1	0.0868	0.0854	0.0014
1	2013-07-09	1	0	36	Dermaptera				1	0.0632	0.0616	0.0016
1	2013-07-09	1	0	36	Araneae	Lycosidae	Pardosa sumatrana		2	0.0223	0.021	0.0013
1	2013-07-09	1	2	13	Isopoda				17	0.0878	0.0524	0.0354
1	2013-07-09	1	2	13	Hymenoptera	Formicidae			30	0.0672	0.0485	0.0187
1	2013-07-09	1	2	13	Amphipoda				5	0.0571	0.0534	0.0037
1	2013-07-09	1	2	13	Araneae	Linyphiidae	Spider 28		3	0.0711	0.0591	0.012
1	2013-07-09	1	2	13	Coleoptera	Staphylinidae			1	0.045	0.0446	0.0004
1	2013-07-09	1	2	13	Coleoptera				2	0.0463	0.0452	0.0011
1	2013-07-09	1	2	29	Hymenoptera	Formicidae			1	0.0765	0.07	0.0065
1	2013-07-09	1	2	29	Heteroptera				1	0.0725	0.0685	0.004
1	2013-07-09	1	2	29	Araneae	Corinnidae	Spider 38		3	0.0733	0.0689	0.0044
1	2013-07-09	1	2	43	Araneae	Sparassidae	Heteropoda		1	0.1165	0.0535	0.063
1	2013-07-09	1	2	43	Isopoda				3	0.0516	0.0463	0.0053
1	2013-07-09	1	2	43	Orthoptera	Gryllidae			3	0.0551	0.0544	0.0007
1	2013-07-09	1	2	43	Orthoptera	Tetragidae			3	0.0523	0.0515	0.0008
1	2013-07-09	1	2	43	Hymenoptera	Formicidae			6	0.0614	0.0587	0.0027
1	2013-07-09	1	2	43	Blattodea				3	0.0625	0.0622	0.0003
1	2013-07-09	1	2	43	Amphipoda				1	0.0808	0.0807	0.0001
1	2013-07-09	1	2	43	Heteroptera				1	0.07	0.0651	0.0049
1	2013-07-09	1	5	6	Hymenoptera	Formicidae			30	0.1235	0.0462	0.0773
1	2013-07-09	1	5	6	Isopoda				5	0.0686	0.0486	0.02
1	2013-07-09	1	5	6	Diplopoda				4	0.0536	0.046	0.0076
1	2013-07-09	1	5	6	Opiliones	Phalangodidae			1	0.0443	0.0432	0.0011
1	2013-07-09	1	5	6	Lepidoptera (larvae)				1	0.0585	0.0508	0.0077
1	2013-07-09	1	5	6	Acari				2	0.0499	0.0493	0.0006
1	2013-07-09	1	5	6	Amphipoda				1	0.0699	0.0692	0.0007
1	2013-07-09	1	5	6	Araneae	Lycosidae	Spider 4		2	0.0778	0.0758	0.002
1	2013-07-09	1	5	36	Isopoda				3	0.0657	0.0567	0.009
1	2013-07-09	1	5	36	Diplopoda				1	0.0748	0.0711	0.0037
1	2013-07-09	1	5	36	Orthoptera	Gryllidae			1	0.1079	0.1076	0.0003
1	2013-07-09	1	5	36	Hymenoptera	Formicidae			8	0.0481	0.0464	0.0017
1	2013-07-09	1	5	36	Heteroptera				1	0.06	0.0574	0.0026
1	2013-07-09	1	5	46	Isopoda				22	0.1442	0.0754	0.0688
1	2013-07-09	1	5	46	Araneae	Sparassidae	Heteropoda		1	0.1268	0.0961	0.0307
1	2013-07-09	1	5	46	Heteroptera				2	0.055	0.0489	0.0061
1	2013-07-09	1	5	46	Hymenoptera	Formicidae			2	0.0546	0.0524	0.0022
1	2013-07-09	1	5	46	Amphipoda				1	0.0514	0.0504	0.001
1	2013-07-09	1	5	46	Araneae	Agelenidae	Draconarius		1	0.0481	0.0465	0.0016
1	2013-07-09	1	5	46	Araneae	Salticidae	Spider 6		1	0.0445	0.0424	0.0021
1	2013-07-09	1	5	46	Araneae	Gnaphosidae	Spider 43		1	0.0713	0.0687	0.0026
1	2013-07-09	1	5	46	Araneae	Linyphiidae	Spider 70		4	0.0601	0.0526	0.0075
1	2013-07-09	1	5	6	Araneae	Lycosidae	Spider 23		3	0.0804	0.0768	0.0036
1	2013-07-09	1	5	6	Araneae	Theridiiae	Spider 7		2	0.0764	0.0755	0.0009
1	2013-07-09	1	10	7	Isopoda				25	0.1168	0.0512	0.0656
1	2013-07-09	1	10	7	Coleoptera	Carabidae			7	0.0723	0.0644	0.0079
1	2013-07-09	1	10	7	Coleoptera	Lagriidae			3	0.0791	0.0644	0.0147
1	2013-07-09	1	10	7	Diplopoda				4	0.0592	0.0486	0.0106
1	2013-07-09	1	10	7	Dermaptera				1	0.0497	0.0467	0.003
1	2013-07-09	1	10	7	Hymenoptera	Formicidae			59	0.0573	0.0536	0.0037
1	2013-07-09	1	10	12	Isopoda				33	0.1546	0.0602	0.0944
1	2013-07-09	1	10	12	Hymenoptera	Formicidae			30	0.0736	0.071	0.0026
1	2013-07-09	1	10	12	Diplopoda				1	0.0831	0.0823	0.0008
1	2013-07-09	1	10	12	Coleoptera	Lagriidae			1	0.0585	0.0578	0.0007
1	2013-07-09	1	10	13	Isopoda				5	0.0732	0.0561	0.0171
1	2013-07-09	1	10	13	Hymenoptera	Formicidae			134	0.0503	0.0395	0.0108
1	2013-07-09	1	10	13	Coleoptera	Staphylinidae			6	0.0768	0.0761	0.0007
1	2013-07-22	1	0	10	Isopoda				1	0.0639	0.0632	0.0007
1	2013-07-22	1	0	10	Blattodea				3	0.0805	0.0672	0.0133
1	2013-07-22	1	0	10	Hymenoptera	Formicidae			2	0.0672	0.0626	0.0046
1	2013-07-22	1	0	10	Orthoptera	Tetragidae			1	0.0655	0.0637	0.0018
1	2013-07-22	1	0	14	Blattodea				5	0.1971	0.0706	0.1265
1	2013-07-22	1	0	14	Araneae	Pisauridae	Hygropoda		1	0.0729	0.0707	0.0022
1	2013-07-22	1	0	14	Orthoptera	Gryllidae			3	0.0536	0.0524	0.0012
1	2013-07-22	1	0	14	Hymenoptera	Formicidae			2	0.0791	0.0789	0.0002
1	2013-07-22	1	0	14	Coleoptera	Staphylinidae			2	0.0596	0.0596	0
1	2013-07-22	1	0	28	Araneae	Lycosidae	Pardosa sumatrana		2	0.0393	0.0382	0.0011
1	2013-07-22	1	0	28	Hymenoptera	Formicidae			1	0.072	0.0698	0.0022
1	2013-07-22	1	0	28	Dermaptera				1	0.0653	0.0646	0.0007
1	2013-07-22	1	0	36	Hymenoptera	Formicidae			6	0.0803	0.0595	0.0208
1	2013-07-22	1	0	36	Dermaptera				7	0.066	0.0619	0.0041
1	2013-07-22	1	0	36	Coleoptera	Staphylinidae			1	0.0752	0.0751	0.0001
1	2013-07-22	1	0	50	Orthoptera	Gryllidae			2	0.0831	0.0729	0.0102
1	2013-07-22	1	0	50	Orthoptera	Tetragidae			5	0.0517	0.0494	0.0023
1	2013-07-22	1	0	50	Pseudoscorpionida				1	0.0522	0.0521	0.0001
1	2013-07-22	1	0	50	Blattodea				1	0.0548	0.0548	0
1	2013-07-22	1	0	50	Araneae	Pisauridae	Hygropoda		1	0.0745	0.0671	0.0074
1	2013-07-22	1	0	50	Araneae	Lycosidae	Pardosa sumatrana		2	0.0546	0.0533	0.0013
1	2013-07-22	1	0	50	Amphipoda				1	0.0807	0.0807	0
1	2013-07-22	1	2	3	Isopoda				2	0.0829	0.0793	0.0036
1	2013-07-22	1	2	3	Hymenoptera	Formicidae			3	0.0709	0.069	0.0019
1	2013-07-22	1	5	22	Opiliones	Phalangodidae			1	0.0793	0.0777	0.0016
1	2013-07-22	1	2	3	Diplopoda				1	0.0863	0.0832	0.0031
1	2013-07-22	1	2	3	Araneae	Agelenidae	Draconarius		1	0.0748	0.074	0.0008
1	2013-07-22	1	2	3	Araneae	Theridiiae	Spider 15		1	0.1308	0.0827	0.0481
1	2013-07-22	1	2	3	Araneae	Sparassidae	Heteropoda		1	0.0252	0.0248	0.0004
1	2013-07-22	1	2	3	Orthoptera	Gryllidae			1	0.0806	0.0806	0
1	2013-07-22	1	2	3	Coleoptera	Carabidae			1	0.1037	0.1037	0
1	2013-07-22	1	2	24	Isopoda				15	0.1025	0.0602	0.0423
1	2013-07-22	1	2	24	Araneae	Sparassidae	Heteropoda		2	0.0695	0.047	0.0225
1	2013-07-22	1	2	24	Dermaptera				1	0.0709	0.0699	0.001
1	2013-08-19	1	5	41	Opiliones	Phalangodidae			2	0.0658	0.0645	0.0013
1	2013-07-22	1	2	24	Chilopoda				1	0.0801	0.0787	0.0014
1	2013-07-22	1	10	48	Araneae	Theridiiae	Spider 44		2	0.0727	0.0714	0.0013
1	2013-07-22	1	2	24	Hymenoptera	Formicidae			1	0.0739	0.0736	0.0003
1	2013-07-22	1	2	24	Coleoptera	Staphylinidae			1	0.0624	0.0606	0.0018
1	2013-07-09	1	5	6	Opiliones	Phalangiidae			1	0.0835	0.0787	0.0048
1	2013-07-22	1	2	41	Orthoptera	Gryllidae			5	0.0538	0.0526	0.0012
1	2013-07-22	1	2	41	Hymenoptera	Formicidae			1	0.0553	0.0539	0.0014
1	2013-07-22	1	2	41	Pseudoscorpionida				1	0.0632	0.063	0.0002
1	2013-07-22	1	2	41	Araneae	Salticidae	Spider 9		5	0.0859	0.0787	0.0072
1	2013-07-22	1	5	11	Isopoda				43	0.1558	0.0603	0.0955
1	2013-07-22	1	5	11	Chilopoda				2	0.0931	0.0889	0.0042
1	2013-07-22	1	5	11	Diplopoda				1	0.0839	0.0818	0.0021
1	2013-07-22	1	5	11	Orthoptera	Gryllidae			2	0.0765	0.0693	0.0072
1	2013-07-22	1	5	11	Hymenoptera	Formicidae			7	0.0971	0.0816	0.0155
1	2013-07-22	1	5	11	Opiliones	Phalangiidae			1	0.0693	0.0676	0.0017
1	2013-07-22	1	5	11	Amphipoda				1	0.0589	0.0569	0.002
1	2013-07-22	1	5	11	Blattodea				1	0.0661	0.0655	0.0006
1	2013-07-22	1	5	11	Araneae	Lycosidae	Spider 23		8	0.1041	0.0653	0.0388
1	2013-07-22	1	5	11	Coleoptera	Lagriidae			1	0.0674	0.0672	0.0002
1	2013-07-22	1	5	22	Isopoda				9	0.0672	0.0564	0.0108
1	2013-07-22	1	5	22	Myriapoda				2	0.0749	0.0636	0.0113
1	2013-07-22	1	5	22	Opiliones	Phalangodidae			1	0.0778	0.077	0.0008
1	2013-07-22	1	5	22	Orthoptera	Gryllidae			1	0.0587	0.0587	0
1	2013-07-22	1	5	22	Isoptera				2	0.0808	0.0768	0.004
1	2013-07-22	1	5	22	Blattodea				1	0.0534	0.0528	0.0006
1	2013-07-22	1	5	39	Isopoda				2	0.0647	0.0584	0.0063
1	2013-07-22	1	5	39	Chilopoda				3	0.088	0.078	0.01
1	2013-07-22	1	5	39	Diplopoda				1	0.0738	0.0733	0.0005
1	2013-07-22	1	5	39	Orthoptera	Gryllidae			2	0.0759	0.0749	0.001
1	2013-07-22	1	5	39	Isoptera				1	0.0509	0.0508	0.0001
1	2013-07-22	1	5	39	Hymenoptera	Formicidae			1	0.0576	0.0574	0.0002
1	2013-07-22	1	5	39	Heteroptera				1	0.0992	0.0916	0.0076
1	2013-07-22	1	5	39	Araneae	Agelenidae	Draconarius		2	0.0673	0.0651	0.0022
1	2013-07-22	1	5	39	Araneae	Sparassidae	Heteropoda		1	0.1002	0.0933	0.0069
1	2013-07-22	1	5	39	Araneae	Agelenidae	Draconarius		4	0.0783	0.0759	0.0024
1	2013-07-22	1	5	22	Araneae	Linyphiidae	Spider 28		3	0.0592	0.0573	0.0019
1	2013-07-22	1	5	22	Araneae	Lycosidae	Spider 20		3	0.0831	0.0818	0.0013
1	2013-07-22	1	5	22	Araneae	Lycosidae	Spider 23		6	0.0951	0.0875	0.0076
1	2013-07-22	1	5	11	Araneae	Amaurobiidae	Spider 36		2	0.0528	0.0511	0.0017
1	2013-07-22	1	5	11	Araneae	Lycosidae	Spider 23		18	0.0578	0.0551	0.0027
1	2013-07-22	1	10	11	Isopoda				17	0.1384	0.0907	0.0477
1	2013-07-22	1	10	11	Dermaptera				1	0.1073	0.1011	0.0062
1	2013-07-22	1	10	11	Hymenoptera	Formicidae			3	0.0795	0.079	0.0005
1	2013-07-22	1	10	11	Diplopoda				1	0.0765	0.0751	0.0014
1	2013-07-22	1	10	25	Isopoda				12	0.0895	0.0638	0.0257
1	2013-07-22	1	10	25	Hymenoptera	Formicidae			7	0.0708	0.066	0.0048
1	2013-07-22	1	10	25	Orthoptera	Tetragidae			2	0.0655	0.0644	0.0011
1	2013-07-22	1	10	25	Araneae	Agelenidae	Draconarius		2	0.077	0.0765	0.0005
1	2013-07-22	1	10	48	Isopoda				3	0.0639	0.0466	0.0173
1	2013-07-22	1	10	48	Hymenoptera	Formicidae			2	0.0591	0.0531	0.006
1	2013-07-22	1	10	48	Dermaptera				1	0.0643	0.0551	0.0092
1	2013-07-22	1	10	48	Opiliones	Phalangodidae			1	0.0525	0.0499	0.0026
1	2013-07-22	1	10	48	Chilopoda				1	0.0496	0.0488	0.0008
1	2013-07-22	1	10	48	Diplopoda				1	0.0495	0.0488	0.0007
1	2013-07-22	1	10	48	Hymenoptera	Formicidae			12	0.0658	0.0481	0.0177
1	2013-07-22	1	10	48	Isopoda				2	0.0846	0.0824	0.0022
1	2013-07-22	1	10	48	Heteroptera				1	0.0775	0.0753	0.0022
1	2013-07-22	1	10	48	Opiliones	Phalangodidae			1	0.057	0.0564	0.0006
1	2013-07-22	1	10	48	Isopoda				16	0.1544	0.0844	0.07
1	2013-07-22	1	10	48	Hymenoptera	Formicidae			35	0.0673	0.0561	0.0112
1	2013-07-22	1	10	48	Chilopoda				2	0.0628	0.0544	0.0084
1	2013-07-22	1	10	48	Diplopoda				2	0.0644	0.0544	0.01
1	2013-07-22	1	10	48	Blattodea				5	0.075	0.0603	0.0147
1	2013-07-22	1	10	48	Opiliones	Phalangodidae			2	0.0585	0.0557	0.0028
1	2013-07-22	1	10	48	Amphipoda				1	0.0794	0.079	0.0004
1	2013-07-22	1	10	48	Pseudoscorpionida				1	0.0607	0.0606	0.0001
1	2013-07-22	1	10	48	Heteroptera				1	0.0603	0.0598	0.0005
1	2013-07-22	1	10	48	Coleoptera	Staphylinidae			1	0.072	0.0601	0.0119
1	2013-07-22	1	10	48	Araneae	Agelenidae	Draconarius		2	0.062	0.0613	0.0007
1	2013-07-22	1	10	48	Araneae	Salticidae	Spider 9		2	0.0611	0.0607	0.0004
1	2013-07-22	1	10	48	Hymenoptera	Formicidae			7	0.1001	0.0807	0.0194
1	2013-07-22	1	10	48	Hymenoptera	Formicidae			6	0.0759	0.0674	0.0085
1	2013-07-22	1	10	48	Isoptera				2	0.058	0.0567	0.0013
1	2013-07-22	1	10	48	Orthoptera	Gryllidae			4	0.0596	0.0568	0.0028
1	2013-07-22	1	10	48	Coleoptera	Coccinellidae			1	0.0601	0.059	0.0011
1	2013-07-22	1	10	48	Araneae	Agelenidae	Draconarius		2	0.074	0.0719	0.0021
1	2013-07-22	1	10	48	Araneae	Theridiiae	Spider 7		2	0.07	0.0684	0.0016
1	2013-07-22	1	10	25	Araneae	Gnaphosidae	Spider 16		2	0.0478	0.045	0.0028
1	2013-07-22	1	10	25	Araneae	Salticidae	Spider 6		3	0.0817	0.0807	0.001
1	2013-07-22	1	10	25	Araneae	Lycosidae	Spider 23		4	0.0962	0.0952	0.001
1	2013-07-22	1	10	48	Araneae	Lycosidae	Spider 23		12	0.0613	0.0585	0.0028
1	2013-07-22	1	10	25	Araneae	Linyphiidae	Spider 67		1	0.0639	0.0631	0.0008
1	2013-07-22	1	10	25	Araneae	Gnaphosidae	Spider 26		8	0.0957	0.078	0.0177
1	2013-08-19	1	0	5	Blattodea				3	0.1028	0.0911	0.0117
1	2013-08-19	1	0	5	Orthoptera	Tetragidae			2	0.1107	0.1002	0.0105
1	2013-08-19	1	0	5	Orthoptera	Gryllidae			5	0.0698	0.0675	0.0023
1	2013-08-19	1	0	5	Araneae	Amaurobiidae	Spider 19		1	0.0555	0.0553	0.0002
1	2013-08-19	1	0	5	Coleoptera	Carabidae			2	0.065	0.0643	0.0007
1	2013-08-19	1	0	16	Orthoptera	Gryllidae			5	0.0688	0.0653	0.0035
1	2013-08-19	1	0	16	Hymenoptera	Formicidae			1	0.0521	0.0508	0.0013
1	2013-08-19	1	0	16	Araneae	Lycosidae	Pardosa sumatrana		2	0.0389	0.0375	0.0014
1	2013-09-11	1	5	16	Araneae	Theridiiae	Spider 7		1	0.0647	0.0643	0.0004
1	2013-08-19	1	0	22	Dermaptera				1	0.0628	0.0626	0.0002
1	2013-08-19	1	0	22	Araneae	Lycosidae	Pardosa sumatrana		2	0.0317	0.0301	0.0016
1	2013-08-19	1	0	38	Isopoda				1	0.0661	0.0648	0.0013
1	2013-08-19	1	0	38	Blattodea				4	0.0655	0.0646	0.0009
1	2013-08-19	1	0	38	Orthoptera	Gryllidae			4	0.0704	0.0688	0.0016
1	2013-08-19	1	0	38	Orthoptera	Tetragidae			2	0.0659	0.065	0.0009
1	2013-08-19	1	0	38	Hymenoptera	Formicidae			1	0.083	0.0828	0.0002
1	2013-08-19	1	0	47	Araneae	Lycosidae	Pardosa sumatrana		2	0.0275	0.0259	0.0016
1	2013-08-19	1	0	47	Orthoptera	Tetragidae			3	0.051	0.0491	0.0019
1	2013-08-19	1	0	47	Blattodea				1	0.0736	0.0733	0.0003
1	2013-08-19	1	0	47	Coleoptera	Carabidae			2	0.0736	0.0736	0
1	2013-08-19	1	2	12	Opiliones	Phalangodidae			1	0.0698	0.069	0.0008
1	2013-08-19	1	2	12	Isopoda				1	0.0549	0.0533	0.0016
1	2013-08-19	1	2	12	Orthoptera	Gryllidae			1	0.0715	0.0707	0.0008
1	2013-08-19	1	2	12	Coleoptera	Staphylinidae			1	0.0663	0.0652	0.0011
1	2013-08-19	1	2	12	Araneae	Agelenidae	Draconarius		1	0.0693	0.0687	0.0006
1	2013-08-19	1	2	19	Isoptera				6	0.0866	0.0764	0.0102
1	2013-08-19	1	2	19	Blattodea				4	0.0567	0.0554	0.0013
1	2013-08-19	1	2	19	Araneae	Linyphiidae	Spider 47		2	0.0754	0.0519	0.0235
1	2013-08-19	1	2	31	Isopoda				3	0.0724	0.0701	0.0023
1	2013-08-19	1	2	31	Blattodea				1	0.0637	0.0635	0.0002
1	2013-08-19	1	2	31	Hymenoptera	Formicidae			1	0.0651	0.0649	0.0002
1	2013-08-19	1	2	31	Isoptera				1	0.0784	0.0783	0.0001
1	2013-08-19	1	5	10	Isopoda				11	0.0901	0.075	0.0151
1	2013-08-19	1	5	10	Myriapoda				1	0.0634	0.0618	0.0016
1	2013-08-19	1	5	10	Hymenoptera	Formicidae			2	0.0667	0.0653	0.0014
1	2013-08-19	1	5	10	Lepidoptera (larvae)				1	0.0722	0.0703	0.0019
1	2013-08-19	1	5	10	Opiliones	Phalangodidae			1	0.0718	0.0708	0.001
1	2013-08-19	1	5	10	Amphipoda				1	0.0705	0.0701	0.0004
1	2013-08-19	1	5	10	Araneae	Gnaphosidae	Spider 72		6	0.0738	0.0667	0.0071
1	2013-08-19	1	5	33	Isopoda				7	0.0758	0.0667	0.0091
1	2013-08-19	1	5	33	Blattodea				3	0.0872	0.0645	0.0227
1	2013-08-19	1	5	33	Hymenoptera	Formicidae			17	0.0618	0.0579	0.0039
1	2013-08-19	1	5	33	Orthoptera	Tetragidae			1	0.0695	0.0589	0.0106
1	2013-08-19	1	5	33	Araneae	Linyphiidae	Spider 53		2	0.0703	0.0695	0.0008
1	2013-08-19	1	5	33	Araneae	Salticidae	Spider 8		2	0.1056	0.0769	0.0287
1	2013-08-19	1	5	33	Orthoptera	Gryllidae			1	0.0626	0.0623	0.0003
1	2013-08-19	1	5	41	Isopoda				7	0.103	0.0893	0.0137
1	2013-08-19	1	5	41	Orthoptera	Gryllidae			1	0.0746	0.0654	0.0092
1	2013-08-19	1	5	41	Hymenoptera	Formicidae			6	0.0756	0.0675	0.0081
1	2013-08-19	1	5	41	Opiliones	Phalangodidae			3	0.0703	0.0676	0.0027
1	2013-08-19	1	5	41	Myriapoda				1	0.0638	0.0632	0.0006
1	2013-08-19	1	5	41	Araneae	Amaurobiidae	Spider 12		10	0.1099	0.0847	0.0252
1	2013-08-19	1	5	10	Araneae	Gnaphosidae	Spider 52		6	0.0713	0.0648	0.0065
1	2013-08-19	1	5	41	Araneae	Theridiiae	Spider 3		1	0.0831	0.0828	0.0003
1	2013-08-19	1	5	33	Araneae	Theridiiae	Spider 51		1	0.0834	0.0829	0.0005
1	2013-08-19	1	5	33	Araneae	Gnaphosidae	Spider 43		3	0.0782	0.0696	0.0086
1	2013-08-19	1	5	33	Araneae	Lycosidae	Spider 23		3	0.0776	0.0693	0.0083
1	2013-08-19	1	5	10	Araneae	Salticidae	Spider 8		2	0.0546	0.0528	0.0018
1	2013-08-19	1	5	10	Araneae	Amaurobiidae	Spider 36		4	0.0473	0.0458	0.0015
1	2013-08-19	1	5	41	Araneae	Theridiiae	Spider 51		1	0.0428	0.0425	0.0003
1	2013-08-19	1	10	14	Isopoda				9	0.1371	0.1063	0.0308
1	2013-08-19	1	10	14	Coleoptera	Carabidae			2	0.0572	0.0476	0.0096
1	2013-08-19	1	10	14	Orthoptera	Gryllidae			2	0.0466	0.0449	0.0017
1	2013-08-19	1	10	14	Orthoptera	Tetragidae			2	0.053	0.051	0.002
1	2013-08-19	1	10	14	Hymenoptera	Formicidae			2	0.0707	0.0703	0.0004
1	2013-08-19	1	10	14	Araneae	Agelenidae	Draconarius		1	0.0512	0.0506	0.0006
1	2013-08-19	1	10	31	Isopoda				14	0.12	0.0865	0.0335
1	2013-08-19	1	10	31	Orthoptera	Tetragidae			2	0.0599	0.0574	0.0025
1	2013-08-19	1	10	31	Orthoptera	Gryllidae			3	0.0783	0.0763	0.002
1	2013-08-19	1	10	31	Araneae	Agelenidae	Draconarius		1	0.058	0.0512	0.0068
1	2013-08-19	1	10	50	Isopoda				12	0.0942	0.062	0.0322
1	2013-08-19	1	10	50	Hymenoptera	Formicidae			8	0.0476	0.0455	0.0021
1	2013-08-19	1	10	50	Chilopoda				3	0.0926	0.0759	0.0167
1	2013-08-19	1	10	50	Diplopoda				2	0.0809	0.0759	0.005
1	2013-08-19	1	10	50	Coleoptera	Cantharidae			1	0.1326	0.0812	0.0514
1	2013-08-19	1	10	50	Acari				1	0.068	0.0679	0.0001
1	2013-08-19	1	10	50	Opiliones	Phalangodidae			3	0.0506	0.0472	0.0034
1	2013-08-19	1	10	50	Heteroptera				1	0.062	0.0554	0.0066
1	2013-08-19	1	10	50	Orthoptera	Tetragidae			1	0.053	0.0525	0.0005
1	2013-08-19	1	10	50	Coleoptera	Staphylinidae			1	0.0489	0.0485	0.0004
1	2013-08-19	1	10	50	Coleoptera	Carabidae			3	0.0582	0.057	0.0012
1	2013-08-19	1	10	50	Coleoptera	Tenebrionidae			1	0.0436	0.0428	0.0008
1	2013-08-19	1	10	31	Araneae	Amaurobiidae	Spider 22		2	0.0674	0.0598	0.0076
1	2013-08-19	1	10	31	Araneae	Theridiiae	Spider 7		1	0.0593	0.0589	0.0004
1	2013-08-19	1	10	31	Araneae	Linyphiidae	Spider 28		1	0.0968	0.0939	0.0029
1	2013-08-19	1	10	31	Araneae	Lycosidae	Spider 23		4	0.0746	0.071	0.0036
1	2013-08-19	1	10	31	Araneae	Gnaphosidae	Spider 66		4	0.0573	0.0551	0.0022
1	2013-08-19	1	10	14	Araneae	Oecobiidae	Spider 31		1	0.063	0.0609	0.0021
1	2013-08-19	1	10	31	Araneae	Lycosidae	Spider 13		1	0.068	0.0677	0.0003
1	2013-08-19	1	10	14	Araneae	Theridiiae	Spider 50		3	0.0654	0.0638	0.0016
1	2013-08-19	1	10	31	Araneae	Lycosidae	Spider 23		2	0.1123	0.1116	0.0007
1	2013-08-19	1	10	14	Araneae	Amaurobiidae	Spider 25		5	0.0494	0.0462	0.0032
1	2013-08-19	1	10	31	Araneae	Corinnidae	Spider 54		1	0.0573	0.0564	0.0009
1	2013-09-11	1	0	9	Araneae	Sparassidae	Heteropoda		1	0.0713	0.0423	0.029
1	2013-09-11	1	0	9	Hymenoptera	Formicidae			4	0.0729	0.072	0.0009
1	2013-09-11	1	0	9	Orthoptera	Tetragidae			3	0.049	0.0421	0.0069
1	2013-09-11	1	0	9	Orthoptera	Gryllidae			4	0.061	0.0598	0.0012
1	2013-08-19	1	5	33	Araneae	Gnaphosidae	Spider 26		1	0.0624	0.0623	0.0001
1	2013-09-11	1	0	12	Blattodea				2	0.0817	0.0725	0.0092
1	2013-09-11	1	0	12	Orthoptera	Gryllidae			6	0.0733	0.0677	0.0056
1	2013-09-11	1	0	12	Hymenoptera	Formicidae			2	0.0907	0.09	0.0007
1	2013-09-11	1	0	12	Araneae	Lycosidae	Pardosa sumatrana		1	0.0356	0.0333	0.0023
1	2013-09-11	1	0	12	Coleoptera	Pselaphidae			1	0.0773	0.0768	0.0005
1	2013-09-11	1	0	12	Coleoptera	Lucanidae			1	0.0774	0.0768	0.0006
1	2013-09-11	1	0	23	Blattodea				10	0.1519	0.0615	0.0904
1	2013-09-11	1	0	23	Orthoptera	Gryllidae			2	0.0728	0.0685	0.0043
1	2013-09-11	1	0	23	Hymenoptera	Formicidae			1	0.0591	0.0581	0.001
1	2013-09-11	1	0	37	Isoptera				1	0.0686	0.0651	0.0035
1	2013-09-11	1	0	37	Blattodea				6	0.049	0.0444	0.0046
1	2013-09-11	1	0	37	Orthoptera	Tetragidae			1	0.0441	0.0438	0.0003
1	2013-09-11	1	0	37	Orthoptera	Gryllidae			1	0.0413	0.0411	0.0002
1	2013-09-11	1	0	37	Hymenoptera	Formicidae			1	0.0792	0.0684	0.0108
1	2013-09-11	1	0	37	Coleoptera	Carabidae			1	0.0408	0.0407	0.0001
1	2013-09-11	1	0	37	Araneae	Pisauridae	Hygropoda		1	0.0429	0.0424	0.0005
1	2013-09-11	1	0	37	Araneae	Agelenidae	Draconarius		2	0.0668	0.0644	0.0024
1	2013-09-11	1	0	42	Orthoptera	Gryllidae			9	0.0739	0.0652	0.0087
1	2013-09-11	1	0	42	Trichoptera	Hydropsychidae			1	0.065	0.0645	0.0005
1	2013-09-11	1	0	42	Trichoptera (Larvae)	Calamoceratidae			1	0.0657	0.0645	0.0012
1	2013-09-11	1	0	42	Hymenoptera	Formicidae			3	0.0668	0.0666	0.0002
1	2013-09-11	1	0	42	Orthoptera	Tetragidae			1	0.0486	0.0483	0.0003
1	2013-09-11	1	0	42	Heteroptera	Gerridae			1	0.0712	0.0711	0.0001
1	2013-09-11	1	0	42	Blattodea				2	0.0484	0.0476	0.0008
1	2013-09-11	1	0	42	Coleoptera	Pselaphidae			4	0.0604	0.06	0.0004
1	2013-09-11	1	0	42	Coleoptera	Melandryidae			1	0.0604	0.06	0.0004
1	2013-09-11	1	2	9	Orthoptera	Tetragidae			2	0.0609	0.0551	0.0058
1	2013-09-11	1	2	9	Orthoptera	Gryllidae			4	0.0796	0.0778	0.0018
1	2013-09-11	1	2	9	Blattodea				1	0.0709	0.0703	0.0006
1	2013-09-11	1	2	9	Collembola				1	0.0767	0.0766	0.0001
1	2013-09-11	1	2	9	Hymenoptera	Formicidae			1	0.0721	0.0719	0.0002
1	2013-09-11	1	2	9	Araneae	Lycosidae	Pardosa sumatrana		1	0.033	0.0316	0.0014
1	2013-09-11	1	2	9	Araneae	Linyphiidae	Spider 29		1	0.0642	0.0639	0.0003
1	2013-09-11	1	2	18	Opiliones	Phalangodidae			1	0.0451	0.0415	0.0036
1	2013-09-11	1	2	18	Isopoda				7	0.0665	0.0513	0.0152
1	2013-07-22	1	5	11	Opiliones	Phalangodidae			1	0.0723	0.0707	0.0016
1	2013-09-11	1	2	18	Hymenoptera	Formicidae			9	0.082	0.0798	0.0022
1	2013-09-11	1	2	18	Isoptera				5	0.0774	0.0743	0.0031
1	2013-09-11	1	2	18	Acari				1	0.095	0.0947	0.0003
1	2013-09-11	1	2	18	Coleoptera	Carabidae			1	0.0426	0.0415	0.0011
1	2013-09-11	1	2	18	Araneae	Sparassidae	Heteropoda		1	0.0323	0.0304	0.0019
1	2013-09-11	1	2	33	Isoptera				7	0.0692	0.052	0.0172
1	2013-09-11	1	2	33	Hymenoptera	Formicidae			2	0.0524	0.0518	0.0006
1	2013-09-11	1	2	33	Acari				1	0.0705	0.0701	0.0004
1	2013-09-11	1	2	33	Araneae	Theridiiae	Spider 3		1	0.0948	0.0825	0.0123
1	2013-09-11	1	5	16	Isoptera				4	0.0911	0.0879	0.0032
1	2013-09-11	1	5	16	Hymenoptera	Formicidae			10	0.0895	0.0791	0.0104
1	2013-09-11	1	5	16	Orthoptera	Tetragidae			1	0.0665	0.0657	0.0008
1	2013-09-11	1	5	16	Araneae	Linyphiidae	Spider 57		3	0.0741	0.0727	0.0014
1	2013-09-11	1	5	34	Isoptera				4	0.0619	0.0541	0.0078
1	2013-09-11	1	5	34	Collembola				1	0.1007	0.1006	0.0001
1	2013-09-11	1	5	34	Blattodea				2	0.0451	0.0421	0.003
1	2013-09-11	1	5	34	Araneae	Agelenidae	Draconarius		1	0.0378	0.0365	0.0013
1	2013-09-11	1	5	43	Araneae	Sparassidae	Heteropoda		1	0.1247	0.0955	0.0292
1	2013-09-11	1	5	43	Isopoda				8	0.105	0.0914	0.0136
1	2013-09-11	1	5	43	Isoptera				24	0.0884	0.085	0.0034
1	2013-09-11	1	5	43	Orthoptera	Gryllidae			3	0.0878	0.0856	0.0022
1	2013-09-11	1	5	43	Blattodea				3	0.1028	0.0993	0.0035
1	2013-09-11	1	5	43	Hymenoptera	Formicidae			10	0.1135	0.1012	0.0123
1	2013-09-11	1	5	43	Araneae	Salticidae	Spider 10		1	0.0885	0.0822	0.0063
1	2013-09-11	1	5	43	Araneae	Agelenidae	Draconarius		6	0.1012	0.0951	0.0061
1	2013-09-11	1	5	43	Araneae	Sparassidae	Spider 21		1	0.0873	0.0837	0.0036
1	2013-09-11	1	5	43	Araneae	Theridiiae	Spider 41		1	0.0522	0.0501	0.0021
1	2013-09-11	1	10	16	Hymenoptera	Formicidae			75	0.1172	0.0846	0.0326
1	2013-09-11	1	10	16	Isoptera				3	0.0932	0.079	0.0142
1	2013-09-11	1	10	16	Orthoptera	Tetragidae			1	0.0813	0.0803	0.001
1	2013-09-11	1	10	16	Orthoptera	Gryllidae			1	0.1055	0.1046	0.0009
1	2013-09-11	1	10	16	Coleoptera	Cantharidae	Coleop (15)		1	0.0538	0.0529	0.0009
1	2013-09-11	1	10	23	Hymenoptera	Formicidae			49	0.1274	0.0812	0.0462
1	2013-09-11	1	10	23	Isopoda				4	0.0841	0.0787	0.0054
1	2013-09-11	1	10	23	Isoptera				17	0.074	0.0701	0.0039
1	2013-09-11	1	10	23	Myriapoda				4	0.0758	0.0701	0.0057
1	2013-09-11	1	10	23	Orthoptera	Gryllidae			2	0.0666	0.0637	0.0029
1	2013-09-11	1	10	23	Opiliones	Phalangodidae			2	0.0678	0.0659	0.0019
1	2013-09-11	1	10	23	Blattodea				3	0.0812	0.075	0.0062
1	2013-09-11	1	10	23	Heteroptera				1	0.0574	0.0559	0.0015
1	2013-09-11	1	10	23	Orthoptera	Tetragidae			1	0.0638	0.0628	0.001
1	2013-09-11	1	10	23	Araneae	Gnaphosidae	Spider 69		9	0.0912	0.0622	0.029
1	2013-09-11	1	10	23	Araneae	Sparassidae	Heteropoda		3	0.1038	0.0854	0.0184
1	2013-09-11	1	10	38	Heteroptera				3	0.0688	0.0578	0.011
1	2013-09-11	1	10	38	Isopoda				18	0.0934	0.0542	0.0392
1	2013-09-11	1	10	38	Coleoptera	Psephenidae			1	0.063	0.056	0.007
1	2013-09-11	1	10	38	Coleoptera	Carabidae			2	0.0567	0.0498	0.0069
1	2013-09-11	1	10	38	Hymenoptera	Formicidae			240	0.2366	0.0524	0.1842
1	2013-09-11	1	10	38	Opiliones	Phalangiidae			1	0.0638	0.0594	0.0044
1	2013-09-11	1	10	38	Opiliones	Phalangodidae			3	0.0793	0.076	0.0033
1	2013-09-11	1	10	38	Araneae	Salticidae	Spider 2		1	0.0862	0.0792	0.007
1	2013-09-11	1	10	38	Araneae	Agelenidae	Draconarius		12	0.0716	0.0526	0.019
1	2013-09-11	1	10	38	Araneae	Linyphiidae	Spider 28		1	0.0582	0.0539	0.0043
1	2013-09-11	1	10	38	Araneae	Sparassidae	Spider 5		2	0.0893	0.066	0.0233
1	2013-09-11	1	10	38	Araneae	Linyphiidae	Spider 29		1	0.0468	0.0449	0.0019
1	2013-09-11	1	10	38	Araneae	Sparassidae	Heteropoda		1	0.0536	0.0399	0.0137
1	2013-09-11	1	10	38	Chilopoda				1	0.0505	0.0498	0.0007
1	2013-09-11	1	10	23	Araneae	Lycosidae	Spider 23		2	0.0744	0.0739	0.0005
1	2013-09-11	1	10	23	Araneae	Linyphiidae	Spider 57		3	0.0398	0.0375	0.0023
1	2013-09-27	1	0	8	Araneae	Sparassidae	Heteropoda		1	0.1117	0.0695	0.0422
1	2013-09-27	1	0	8	Orthoptera	Gryllidae			4	0.0689	0.0653	0.0036
1	2013-09-27	1	0	8	Blattodea				1	0.0878	0.0865	0.0013
1	2013-09-27	1	0	8	Hymenoptera	Formicidae			3	0.0636	0.0633	0.0003
1	2013-09-27	1	0	8	Opiliones	Phalangiidae			1	0.0776	0.0774	0.0002
1	2013-09-27	1	0	11	Blattodea				7	0.1213	0.0626	0.0587
1	2013-09-27	1	0	11	Orthoptera	Gryllidae			2	0.0676	0.066	0.0016
1	2013-09-27	1	0	11	Araneae	Lycosidae	Pardosa sumatrana		1	0.0475	0.0432	0.0043
1	2013-09-27	1	0	30	Hymenoptera	Formicidae			1	0.0515	0.0427	0.0088
1	2013-09-27	1	0	39	Orthoptera	Gryllidae			4	0.0728	0.0685	0.0043
1	2013-09-27	1	0	39	Orthoptera	Tetragidae			2	0.0646	0.0637	0.0009
1	2013-09-27	1	0	39	Blattodea				1	0.0902	0.089	0.0012
1	2013-09-27	1	0	39	Coleoptera	Pselaphidae			4	0.0716	0.0715	0.0001
1	2013-09-27	1	0	39	Araneae	Lycosidae	Pardosa sumatrana		2	0.0871	0.0808	0.0063
1	2013-09-27	1	0	43	Hymenoptera	Formicidae			1	0.071	0.0645	0.0065
1	2013-09-27	1	0	43	Orthoptera	Tetragidae			1	0.0632	0.0604	0.0028
1	2013-09-27	1	0	43	Orthoptera	Gryllidae			4	0.0893	0.074	0.0153
1	2013-09-27	1	0	43	Blattodea				1	0.0698	0.0694	0.0004
1	2013-09-27	1	0	43	Araneae	Lycosidae	Pardosa sumatrana		2	0.0297	0.026	0.0037
1	2013-09-27	1	2	11	Orthoptera	Gryllidae			2	0.0734	0.0607	0.0127
1	2013-09-27	1	2	11	Orthoptera	Tetragidae			4	0.063	0.0593	0.0037
1	2013-09-27	1	2	11	Lepidoptera (larvae)				1	0.0635	0.061	0.0025
1	2013-09-27	1	2	11	Blattodea				1	0.0652	0.0634	0.0018
1	2013-09-27	1	2	11	Araneae	Agelenidae	Draconarius		2	0.0755	0.0702	0.0053
1	2013-09-27	1	2	22	Araneae	Sparassidae	Heteropoda		1	0.1068	0.0719	0.0349
1	2013-09-27	1	2	22	Blattodea				5	0.0737	0.0679	0.0058
1	2013-09-27	1	2	22	Araneae	Theridiiae	Spider 40		3	0.0951	0.0915	0.0036
1	2013-09-27	1	2	34	Hymenoptera	Formicidae			1	0.0744	0.0703	0.0041
1	2013-09-27	1	2	34	Isopoda				1	0.0799	0.0778	0.0021
1	2013-09-27	1	2	34	Collembola				1	0.0615	0.0615	0
1	2013-09-27	1	2	34	Araneae	Agelenidae	Draconarius		1	0.0839	0.082	0.0019
1	2013-09-27	1	5	2	Isopoda				2	0.1044	0.0964	0.008
1	2013-09-27	1	5	2	Orthoptera	Gryllidae			2	0.0897	0.0867	0.003
1	2013-09-27	1	5	2	Hymenoptera	Formicidae			1	0.0888	0.0868	0.002
1	2013-09-27	1	5	2	Diplopoda				2	0.1025	0.0978	0.0047
1	2013-09-27	1	5	2	Opiliones	Phalangodidae			1	0.0866	0.085	0.0016
1	2013-09-27	1	5	2	Acari				2	0.077	0.0768	0.0002
1	2013-09-27	1	5	2	Araneae	Salticidae	Spider 18		1	0.0671	0.0617	0.0054
1	2013-09-27	1	5	2	Araneae	Corinnidae	Spider 48		4	0.0736	0.0692	0.0044
1	2013-09-27	1	5	2	Araneae	Theridiiae	Spider 15		1	0.0579	0.0552	0.0027
1	2013-09-27	1	5	24	Isopoda				3	0.0564	0.0494	0.007
1	2013-09-27	1	5	24	Heteroptera				4	0.0645	0.0518	0.0127
1	2013-09-27	1	5	24	Collembola				2	0.0525	0.0524	0.0001
1	2013-09-27	1	5	24	Hymenoptera	Formicidae			2	0.0806	0.0801	0.0005
1	2013-09-27	1	5	24	Orthoptera	Tetragidae			1	0.0756	0.0749	0.0007
1	2013-09-27	1	5	24	Orthoptera	Gryllidae			2	0.0528	0.0517	0.0011
1	2013-09-27	1	5	48	Isopoda				17	0.1022	0.0739	0.0283
1	2013-09-27	1	5	48	Phasmatodea				1	0.3645	0.1836	0.1809
1	2013-09-27	1	5	48	Hymenoptera	Formicidae			7	0.0962	0.0674	0.0288
1	2013-09-27	1	5	48	Mantodea				1	0.0557	0.0554	0.0003
1	2013-09-27	1	5	48	Heteroptera				1	0.0623	0.0599	0.0024
1	2013-09-27	1	5	48	Lepidoptera (larvae)				1	0.0552	0.0549	0.0003
1	2013-09-27	1	5	48	Myriapoda				1	0.0922	0.0902	0.002
1	2013-09-27	1	5	48	Acari				1	0.0785	0.0782	0.0003
1	2013-09-27	1	5	48	Araneae	Oecobiidae	Spider 30		21	0.0953	0.0628	0.0325
1	2013-09-27	1	10	6	Heteroptera				2	0.098	0.0736	0.0244
1	2013-09-27	1	10	34	Hymenoptera	Formicidae			70	0.0887	0.0693	0.0194
1	2013-09-27	1	10	34	Isopoda				1	0.0548	0.0506	0.0042
1	2013-09-27	1	10	34	Orthoptera	Gryllidae			1	0.0525	0.052	0.0005
1	2013-09-27	1	10	34	Coleoptera	Carabidae			1	0.0642	0.0601	0.0041
1	2013-09-27	1	10	34	Heteroptera				1	0.0421	0.042	0.0001
1	2013-09-27	1	10	34	Araneae	Linyphiidae	Spider 39		2	0.0676	0.0426	0.025
1	2013-09-27	1	10	34	Araneae	Theridiiae	Spider 11		1	0.0492	0.0485	0.0007
1	2013-09-27	1	10	46	Orthoptera	Tetragidae			1	0.0523	0.0507	0.0016
1	2013-09-27	1	10	46	Isopoda				1	0.0472	0.0459	0.0013
1	2013-09-27	1	10	46	Opiliones	Phalangodidae			3	0.0541	0.0462	0.0079
1	2013-09-27	1	10	46	Hymenoptera	Formicidae			13	0.0882	0.0678	0.0204
1	2013-09-27	1	10	46	Diplopoda				1	0.0558	0.0538	0.002
1	2013-09-27	1	10	46	Araneae	Agelenidae	Draconarius		3	0.0893	0.0838	0.0055
1	2013-09-27	1	10	46	Araneae	Sparassidae	Spider 17		1	0.037	0.0346	0.0024
1	2013-09-27	1	10	46	Araneae	Gnaphosidae	Spider 52		1	0.045	0.0432	0.0018
1	2013-09-27	1	10	46	Araneae	Sparassidae	Heteropoda		1	0.0359	0.034	0.0019
1	2013-09-27	1	10	34	Araneae	Salticidae	Spider 8		4	0.0679	0.0647	0.0032
1	2013-09-27	1	10	34	Araneae	Lycosidae	Spider 37		1	0.0862	0.0856	0.0006
1	2013-09-27	1	10	34	Araneae	Theridiiae	Spider 51		1	0.0647	0.0638	0.0009
1	2013-09-27	1	10	46	Araneae	Theridiiae	Spider 49		1	0.0475	0.046	0.0015
1	2013-07-18	2	0	5	Hymenoptera	Formicidae			2	0.072	0.0623	0.0097
1	2013-07-18	2	0	5	Orthoptera	Tetragidae			1	0.0597	0.0588	0.0009
1	2013-07-18	2	0	5	Dermaptera				1	0.0702	0.0701	0.0001
1	2013-07-18	2	0	9	Dermaptera				2	0.0402	0.0397	0.0005
1	2013-07-18	2	0	9	Hymenoptera	Formicidae			1	0.0399	0.0398	0.0001
1	2013-07-18	2	0	9	Orthoptera	Gryllidae			1	0.0429	0.0427	0.0002
1	2013-07-18	2	0	9	Araneae	Theridiiae	Spider 49		1	0.0375	0.0374	0.0001
1	2013-07-18	2	0	19	Blattodea				1	0.3107	0.1764	0.1343
1	2013-07-18	2	0	19	Hymenoptera	Formicidae			1	0.0861	0.0773	0.0088
1	2013-07-18	2	0	19	Orthoptera	Gryllidae			1	0.0857	0.0854	0.0003
1	2013-07-18	2	0	21	Blattodea				3	0.1299	0.0493	0.0806
1	2013-07-18	2	0	21	Orthoptera	Gryllidae			1	0.0637	0.0619	0.0018
1	2013-07-18	2	0	21	Hymenoptera	Formicidae			1	0.0612	0.0603	0.0009
1	2013-07-18	2	0	21	Coleoptera	Staphylinidae			1	0.0575	0.0571	0.0004
1	2013-07-18	2	0	21	Dermaptera				1	0.0593	0.0591	0.0002
1	2013-07-18	2	0	21	Araneae	Pisauridae	Hygropoda		1	0.0306	0.0295	0.0011
1	2013-07-18	2	0	42	Blattodea				2	0.1448	0.0708	0.074
1	2013-07-18	2	0	42	Orthoptera	Gryllidae			1	0.0514	0.0512	0.0002
1	2013-07-18	2	0	42	Heteroptera				1	0.0703	0.0697	0.0006
1	2013-07-18	2	0	42	Psocoptera				1	0.0748	0.0741	0.0007
1	2013-07-18	2	0	42	Coleoptera	Staphylinidae			1	0.0624	0.0623	0.0001
1	2013-07-18	2	2	19	Araneae	Lycosidae	Pardosa sumatrana		1	0.0839	0.0821	0.0018
1	2013-07-18	2	2	19	Hymenoptera	Formicidae			2	0.0728	0.0679	0.0049
1	2013-07-18	2	2	19	Psocoptera				1	0.1074	0.1073	0.0001
1	2013-07-18	2	2	21	Orthoptera	Tetragidae			4	0.0838	0.0494	0.0344
1	2013-07-18	2	2	21	Blattodea				1	0.0761	0.071	0.0051
1	2013-07-18	2	2	21	Dermaptera				1	0.061	0.0606	0.0004
1	2013-07-18	2	2	21	Orthoptera	Gryllidae			1	0.0728	0.0717	0.0011
1	2013-07-18	2	2	21	Psocoptera				1	0.0602	0.0594	0.0008
1	2013-07-18	2	2	21	Araneae	Lycosidae	Pardosa sumatrana		1	0.0338	0.029	0.0048
1	2013-07-18	2	2	42	Isopoda				12	0.128	0.0996	0.0284
1	2013-07-18	2	2	42	Heteroptera				3	0.0594	0.0566	0.0028
1	2013-07-18	2	2	42	Amphipoda				2	0.0665	0.0636	0.0029
1	2013-07-18	2	2	42	Collembola				1	0.0635	0.0635	0
1	2013-07-18	2	2	19	Araneae	Lycosidae	Pardosa sumatrana		1	0.0065	0.0044	0.0021
1	2013-07-18	2	5	19	Amphipoda				12	0.0777	0.0742	0.0035
1	2013-07-18	2	5	19	Heteroptera				2	0.1109	0.1044	0.0065
1	2013-07-18	2	5	19	Chilopoda				1	0.0713	0.0704	0.0009
1	2013-07-18	2	5	19	Isopoda				1	0.1117	0.1102	0.0015
1	2013-07-18	2	5	21	Hymenoptera	Formicidae			16	0.079	0.0579	0.0211
1	2013-07-18	2	5	21	Chilopoda				1	0.0556	0.0529	0.0027
1	2013-07-18	2	5	21	Amphipoda				12	0.0702	0.0657	0.0045
1	2013-07-18	2	5	21	Isopoda				6	0.0576	0.0519	0.0057
1	2013-07-18	2	5	21	Orthoptera	Gryllidae			1	0.0548	0.0547	0.0001
1	2013-07-18	2	5	42	Orthoptera	Gryllidae			7	0.2083	0.1384	0.0699
1	2013-07-18	2	5	42	Heteroptera				3	0.1573	0.1008	0.0565
1	2013-07-18	2	5	42	Isopoda				10	0.1339	0.099	0.0349
1	2013-07-18	2	5	42	Chilopoda				1	0.0759	0.073	0.0029
1	2013-07-18	2	5	42	Diplopoda				1	0.0782	0.0767	0.0015
1	2013-07-18	2	5	42	Hymenoptera	Formicidae			12	0.1005	0.0887	0.0118
1	2013-07-18	2	5	42	Coleoptera	Staphylinidae			6	0.1064	0.1049	0.0015
1	2013-07-18	2	5	42	Araneae	Agelenidae	Draconarius		1	0.1003	0.0995	0.0008
1	2013-07-18	2	10	19	Opiliones	Phalangiidae			1	0.1003	0.0935	0.0068
1	2013-07-18	2	10	19	Hymenoptera	Formicidae			2	0.0945	0.0819	0.0126
1	2013-07-18	2	10	19	Chilopoda				1	0.0935	0.091	0.0025
1	2013-07-18	2	10	19	Isopoda				7	0.0953	0.0807	0.0146
1	2013-07-18	2	10	19	Amphipoda				3	0.0965	0.0931	0.0034
1	2013-07-18	2	10	19	Orthoptera	Gryllidae			1	0.0691	0.069	0.0001
1	2013-07-18	2	10	19	Araneae	Agelenidae	Draconarius		1	0.0873	0.0867	0.0006
1	2013-07-18	2	10	21	Isopoda				14	0.0574	0.0402	0.0172
1	2013-07-18	2	10	21	Amphipoda				17	0.1021	0.0931	0.009
1	2013-07-18	2	10	21	Orthoptera	Gryllidae			4	0.0752	0.0736	0.0016
1	2013-07-18	2	10	21	Hymenoptera	Formicidae			6	0.0998	0.0899	0.0099
1	2013-07-18	2	10	21	Isoptera				2	0.0873	0.0863	0.001
1	2013-07-18	2	10	21	Araneae	Agelenidae	Draconarius		3	0.0909	0.0875	0.0034
1	2013-07-18	2	10	21	Araneae	Agelenidae	Draconarius		5	0.0967	0.0895	0.0072
1	2013-07-18	2	10	42	-				0			0
1	2013-08-08	2	0	4	Heteroptera	Gerridae			1	0.0762	0.0756	0.0006
1	2013-08-08	2	0	4	Araneae	Lycosidae	Pardosa sumatrana		3	0.0265	0.0236	0.0029
1	2013-08-08	2	0	4	Trichoptera	Philopotamidae			1	0.078	0.0776	0.0004
1	2013-08-08	2	0	4	Coleoptera	Pselaphidae			1	0.0646	0.0645	0.0001
1	2013-08-08	2	0	18	Araneae	Sparassidae	Heteropoda		1	0.0907	0.0734	0.0173
1	2013-08-08	2	0	18	Hymenoptera	Formicidae			3	0.0857	0.0852	0.0005
1	2013-08-08	2	0	18	Blattodea				3	0.1003	0.0946	0.0057
1	2013-08-08	2	0	18	Heteroptera				2	0.0905	0.0897	0.0008
1	2013-08-08	2	0	18	Orthoptera	Gryllidae			1	0.0617	0.0612	0.0005
1	2013-08-08	2	0	18	Dermaptera				1	0.058	0.0575	0.0005
1	2013-08-08	2	0	18	Coleoptera	Carabidae			1	0.083	0.0827	0.0003
1	2013-08-08	2	0	27	Blattodea				2	0.2376	0.0775	0.1601
1	2013-08-08	2	0	27	Orthoptera	Tetragidae			1	0.1002	0.0808	0.0194
1	2013-08-08	2	0	27	Hymenoptera	Formicidae			1	0.0882	0.0866	0.0016
1	2013-08-08	2	0	27	Trichoptera (Larvae)				1	0.0897	0.0891	0.0006
1	2013-08-08	2	0	27	Araneae	Lycosidae	Pardosa sumatrana		2	0.0566	0.0503	0.0063
1	2013-08-08	2	0	37	Orthoptera	Tetragidae			1	0.0981	0.0887	0.0094
1	2013-08-08	2	0	37	Dermaptera				2	0.1051	0.1004	0.0047
1	2013-08-08	2	0	37	Araneae	Lycosidae	Pardosa sumatrana		1	0.0293	0.0281	0.0012
1	2013-08-08	2	0	37	Araneae	Pisauridae	Hygropoda		1	0.0814	0.0812	0.0002
1	2013-08-08	2	0	37	Blattodea				3	0.0789	0.0772	0.0017
1	2013-08-08	2	0	37	Psocoptera				2	0.0877	0.0873	0.0004
1	2013-08-08	2	0	37	Hymenoptera	Formicidae			1	0.0719	0.071	0.0009
1	2013-08-08	2	0	50	Blattodea				2	0.2175	0.0918	0.1257
1	2013-08-08	2	0	50	Orthoptera	Gryllidae			1	0.0987	0.0982	0.0005
1	2013-08-08	2	0	50	Araneae	Lycosidae	Pardosa sumatrana		1	0.0309	0.0291	0.0018
1	2013-08-08	2	0	50	Heteroptera				1	0.0678	0.0668	0.001
1	2013-08-08	2	2	8	Orthoptera	Tetragidae			5	0.0692	0.0444	0.0248
1	2013-08-08	2	2	8	Blattodea				4	0.0631	0.0615	0.0016
1	2013-08-08	2	2	8	Collembola				1	0.0538	0.0536	0.0002
1	2013-08-08	2	2	8	Araneae	Amaurobiidae	Spider 19		1	0.0643	0.0639	0.0004
1	2013-08-08	2	2	23	Orthoptera	Tetragidae			3	0.0908	0.072	0.0188
1	2013-08-08	2	2	23	Orthoptera	Gryllidae			2	0.0817	0.0809	0.0008
1	2013-08-08	2	2	23	Blattodea				3	0.104	0.0966	0.0074
1	2013-08-08	2	2	38	Araneae	Sparassidae	Heteropoda		1	0.0424	0.0274	0.015
1	2013-08-08	2	5	17	Isopoda				10	0.0662	0.0567	0.0095
1	2013-08-08	2	5	17	Blattodea				2	0.0527	0.0507	0.002
1	2013-08-08	2	5	17	Hymenoptera	Formicidae			7	0.069	0.06	0.009
1	2013-08-08	2	5	17	Chilopoda				1	0.0581	0.0578	0.0003
1	2013-08-08	2	5	17	Coleoptera	Coccinellidae			1	0.0645	0.0638	0.0007
1	2013-08-08	2	5	17	Coleoptera	Pselaphidae			1	0.0573	0.0566	0.0007
1	2013-08-08	2	5	17	Coleoptera	Staphylinidae			1	0.0568	0.056	0.0008
1	2013-08-08	2	5	17	Heteroptera				1	0.0627	0.0595	0.0032
1	2013-08-08	2	2	38	Araneae	Agelenidae	Draconarius		1	0.0454	0.044	0.0014
1	2013-08-08	2	5	17	Araneae	Agelenidae	Draconarius		3	0.0572	0.0512	0.006
1	2013-08-08	2	5	17	Araneae	Agelenidae	Draconarius		3	0.0745	0.0696	0.0049
1	2013-08-08	2	5	23	Isopoda				5	0.0762	0.0689	0.0073
1	2013-08-08	2	5	23	Blattodea				4	0.0609	0.0579	0.003
1	2013-08-08	2	5	23	Hymenoptera	Formicidae			3	0.0691	0.0635	0.0056
1	2013-08-08	2	5	23	Orthoptera	Gryllidae			4	0.0592	0.0579	0.0013
1	2013-08-08	2	5	23	Amphipoda				2	0.074	0.0717	0.0023
1	2013-08-08	2	5	23	Coleoptera	Carabidae			1	0.0709	0.0671	0.0038
1	2013-08-08	2	5	23	Coleoptera	Coccinellidae			1	0.0847	0.0839	0.0008
1	2013-08-08	2	5	23	Diplopoda				1	0.051	0.0492	0.0018
1	2013-08-08	2	5	23	Araneae	Sparassidae	Heteropoda		4	0.0487	0.0455	0.0032
1	2013-08-08	2	5	23	Araneae	Agelenidae	Draconarius		2	0.0642	0.0619	0.0023
1	2013-08-08	2	5	33	Chilopoda				4	0.0864	0.0769	0.0095
1	2013-08-08	2	5	33	Opiliones	Phalangiidae			2	0.0845	0.0797	0.0048
1	2013-08-08	2	5	33	Heteroptera				2	0.1011	0.0763	0.0248
1	2013-08-08	2	5	33	Hymenoptera	Formicidae			39	0.1288	0.0976	0.0312
1	2013-08-08	2	5	33	Isopoda				1	0.0651	0.0609	0.0042
1	2013-08-08	2	5	33	Orthoptera	Gryllidae			5	0.0934	0.0919	0.0015
1	2013-08-08	2	5	33	Araneae	Sparassidae	Heteropoda		1	0.0374	0.0363	0.0011
1	2013-08-08	2	5	33	Araneae	Agelenidae	Draconarius		3	0.0808	0.074	0.0068
1	2013-08-08	2	5	33	Araneae	Agelenidae	Draconarius		6	0.0737	0.0626	0.0111
1	2013-08-08	2	5	33	Coleoptera	Silphidae			1	0.074	0.0733	0.0007
1	2013-08-08	2	5	33	Coleoptera (larvae)	Lampyridae			1	0.0484	0.0477	0.0007
1	2013-08-08	2	10	17	Araneae	Sparassidae	Heteropoda		1	0.083	0.0706	0.0124
1	2013-08-08	2	10	17	Hymenoptera	Formicidae			56	0.1063	0.0874	0.0189
1	2013-08-08	2	10	17	Isopoda				6	0.0747	0.0688	0.0059
1	2013-08-08	2	10	17	Amphipoda				1	0.0716	0.0709	0.0007
1	2013-08-08	2	10	17	Isoptera				3	0.0942	0.0926	0.0016
1	2013-08-08	2	10	17	Mantodea				1	0.1129	0.1085	0.0044
1	2013-08-08	2	10	17	Orthoptera	Eumastacoidea			1	0.1034	0.1027	0.0007
1	2013-08-08	2	10	17	Dermaptera				1	0.0814	0.0795	0.0019
1	2013-08-08	2	10	17	Coleoptera	Carabidae			1	0.093	0.0929	0.0001
1	2013-08-08	2	10	33	Isoptera				11	0.1106	0.0952	0.0154
1	2013-08-08	2	10	33	Hymenoptera	Formicidae			4	0.0966	0.0864	0.0102
1	2013-08-08	2	10	33	Chilopoda				1	0.1069	0.104	0.0029
1	2013-08-08	2	10	33	Heteroptera				2	0.1094	0.1078	0.0016
1	2013-08-08	2	10	33	Orthoptera	Gryllidae			1	0.0787	0.0781	0.0006
1	2013-08-08	2	10	33	Araneae	Agelenidae	Draconarius		1	0.0614	0.0591	0.0023
1	2013-08-08	2	10	33	Araneae	Agelenidae	Draconarius		2	0.11	0.1093	0.0007
1	2013-08-08	2	10	42	Isopoda				9	0.0955	0.0747	0.0208
1	2013-08-08	2	10	42	Orthoptera	Tetragidae			2	0.0741	0.064	0.0101
1	2013-08-08	2	10	42	Orthoptera	Gryllidae			7	0.0651	0.0558	0.0093
1	2013-08-08	2	10	42	Amphipoda				2	0.0546	0.0518	0.0028
1	2013-08-08	2	10	42	Hymenoptera	Formicidae			3	0.0487	0.0454	0.0033
1	2013-08-08	2	10	42	Coleoptera	Staphylinidae			2	0.0605	0.0594	0.0011
1	2013-08-08	2	10	42	Coleoptera	Carabidae			2	0.0563	0.0554	0.0009
1	2013-08-08	2	10	42	Collembola				1	0.0603	0.06	0.0003
1	2013-08-08	2	10	42	Diplopoda				1	0.0672	0.0663	0.0009
1	2013-08-08	2	10	42	Blattodea				1	0.0574	0.0567	0.0007
1	2013-08-08	2	10	42	Araneae	Lycosidae	Spider 23		9	0.062	0.0572	0.0048
1	2013-08-26	2	0	7	Hymenoptera	Formicidae			1	0.0523	0.048	0.0043
1	2013-08-26	2	0	7	Dermaptera				1	0.0508	0.0498	0.001
1	2013-08-26	2	0	11	Blattodea				5	0.28	0.1405	0.1395
1	2013-08-26	2	0	11	Hymenoptera	Formicidae			1	0.0981	0.0968	0.0013
1	2013-08-26	2	0	11	Orthoptera	Gryllidae			1	0.0793	0.0788	0.0005
1	2013-08-26	2	0	11	Heteroptera				1	0.0865	0.086	0.0005
1	2013-08-26	2	0	11	Psocoptera				1	0.0996	0.0993	0.0003
1	2013-08-26	2	0	28	Orthoptera	Tetragidae			2	0.1977	0.1625	0.0352
1	2013-08-26	2	0	28	Blattodea				2	0.083	0.0689	0.0141
1	2013-08-08	2	0	28	Araneae	Agelenidae	Draconarius		1	0.0584	0.0573	0.0011
1	2013-08-26	2	0	28	Araneae	Lycosidae	Pardosa sumatrana		1	0.0674	0.066	0.0014
1	2013-08-26	2	0	28	Psocoptera				2	0.0832	0.083	0.0002
1	2013-08-26	2	0	28	Coleoptera	Silphidae			1	0.0879	0.0834	0.0045
1	2013-08-26	2	0	28	Orthoptera	Gryllidae			1	0.0807	0.0802	0.0005
1	2013-08-26	2	0	31	Blattodea				15	0.3152	0.1657	0.1495
1	2013-08-26	2	0	31	Hymenoptera	Formicidae			3	0.0834	0.0788	0.0046
1	2013-08-26	2	0	31	Amphipoda				1	0.0558	0.0545	0.0013
1	2013-08-26	2	0	31	Psocoptera				2	0.0943	0.0941	0.0002
1	2013-08-26	2	0	31	Coleoptera	Carabidae			1	0.0751	0.0747	0.0004
1	2013-08-26	2	0	48	Blattodea				1	0.0995	0.0993	0.0002
1	2013-08-26	2	0	48	Coleoptera	Staphylinidae			1	0.0939	0.0936	0.0003
1	2013-08-26	2	0	28	Araneae	Lycosidae	Pardosa sumatrana		1	0.0078	0.007	0.0008
1	2013-08-26	2	2	17	Blattodea				3	0.1063	0.1045	0.0018
1	2013-08-26	2	2	17	Orthoptera	Gryllidae			1	0.0816	0.081	0.0006
1	2013-08-26	2	2	17	Orthoptera	Tetragidae			1	0.0989	0.0989	0
1	2013-08-26	2	2	17	Psocoptera				1	0.0984	0.0983	0.0001
1	2013-08-26	2	2	31	Orthoptera	Tetragidae			4	0.0953	0.0772	0.0181
1	2013-08-26	2	2	31	Isoptera				40	0.1349	0.1074	0.0275
1	2013-08-26	2	2	31	Blattodea				4	0.0875	0.0862	0.0013
1	2013-08-26	2	2	31	Hymenoptera	Formicidae			7	0.0738	0.071	0.0028
1	2013-08-26	2	2	31	Amphipoda				1	0.0925	0.0919	0.0006
1	2013-08-26	2	2	31	Homoptera				1	0.0624	0.0623	0.0001
1	2013-08-26	2	2	31	Lepidoptera (larvae)				1	0.0789	0.0788	0.0001
1	2013-08-26	2	2	31	Araneae	Lycosidae	Pardosa sumatrana		3	0.0077	0.0043	0.0034
1	2013-08-26	2	2	49	Orthoptera	Gryllidae			1	0.0934	0.0834	0.01
1	2013-08-26	2	2	49	Isopoda				2	0.0504	0.0487	0.0017
1	2013-08-26	2	2	49	Blattodea				2	0.0578	0.0571	0.0007
1	2013-08-26	2	2	49	Amphipoda				1	0.0725	0.0706	0.0019
1	2013-08-26	2	2	49	Araneae	Theridiiae	Spider 44		2	0.0584	0.0528	0.0056
1	2013-08-26	2	5	13	Amphipoda				17	0.0991	0.0862	0.0129
1	2013-08-26	2	5	13	Orthoptera	Gryllidae			3	0.0953	0.0924	0.0029
1	2013-08-26	2	5	13	Isopoda				2	0.0528	0.0517	0.0011
1	2013-08-26	2	5	13	Hymenoptera	Formicidae			1	0.07	0.0693	0.0007
1	2013-08-26	2	5	13	Araneae	Agelenidae	Draconarius		2	0.077	0.074	0.003
1	2013-08-26	2	5	13	Araneae	Sparassidae	Heteropoda		3	0.036	0.0275	0.0085
1	2013-08-26	2	5	22	Isopoda				10	0.1055	0.0954	0.0101
1	2013-08-26	2	5	22	Chilopoda				1	0.0946	0.0915	0.0031
1	2013-08-26	2	5	22	Amphipoda				1	0.0922	0.0918	0.0004
1	2013-08-26	2	5	22	Orthoptera	Gryllidae			2	0.097	0.0958	0.0012
1	2013-08-26	2	5	22	Hymenoptera	Formicidae			6	0.0908	0.0732	0.0176
1	2013-08-26	2	5	22	Dermaptera				1	0.0815	0.0801	0.0014
1	2013-08-26	2	5	22	Collembola				1	0.0781	0.0781	0
1	2013-08-26	2	5	22	Araneae	Sparassidae	Heteropoda		2	0.03	0.0272	0.0028
1	2013-08-26	2	5	22	Araneae	Agelenidae	Draconarius		4	0.1096	0.1054	0.0042
1	2013-08-26	2	5	22	Araneae	Agelenidae	Draconarius		5	0.0826	0.0763	0.0063
1	2013-08-26	2	5	22	Coleoptera	Scarabidae			1	0.111	0.1104	0.0006
1	2013-08-26	2	5	46	Opiliones	Phalangiidae			1	0.0712	0.0661	0.0051
1	2013-08-26	2	5	46	Orthoptera	Gryllidae			7	0.0752	0.0736	0.0016
1	2013-08-26	2	5	46	Hymenoptera	Formicidae			3	0.0917	0.0761	0.0156
1	2013-08-26	2	5	46	Isopoda				1	0.0756	0.0744	0.0012
1	2013-08-26	2	5	46	Chilopoda				1	0.0633	0.0612	0.0021
1	2013-08-26	2	5	46	Amphipoda				1	0.0586	0.0571	0.0015
1	2013-08-26	2	5	46	Blattodea				1	0.0908	0.0903	0.0005
1	2013-08-26	2	5	46	Acari				1	0.083	0.0819	0.0011
1	2013-08-26	2	5	46	Araneae	Agelenidae	Draconarius		1	0.145	0.1436	0.0014
1	2013-08-26	2	5	46	Araneae	Agelenidae	Draconarius		1	0.0907	0.0851	0.0056
1	2013-08-26	2	10	25	Coleoptera (larvae)	Lampyridae			1	0.0736	0.0701	0.0035
1	2013-08-26	2	10	25	Isopoda				3	0.0559	0.0505	0.0054
1	2013-08-26	2	10	25	Amphipoda				2	0.0389	0.0377	0.0012
1	2013-08-26	2	10	25	Hymenoptera	Formicidae			1	0.0483	0.048	0.0003
1	2013-08-26	2	10	30	Araneae	Sparassidae	Heteropoda		2	0.0984	0.0729	0.0255
1	2013-08-26	2	10	30	Orthoptera	Tetragidae			2	0.0523	0.0503	0.002
1	2013-08-26	2	10	30	Isopoda				2	0.058	0.0558	0.0022
1	2013-08-26	2	10	30	Hymenoptera	Formicidae			3	0.0621	0.0602	0.0019
1	2013-08-26	2	10	30	Araneae	Agelenidae	Draconarius		1	0.0575	0.0566	0.0009
1	2013-08-26	2	10	30	Araneae	Agelenidae	Draconarius		4	0.062	0.0589	0.0031
1	2013-08-26	2	10	30	Collembola				1	0.0843	0.0842	0.0001
1	2013-08-26	2	10	43	Hymenoptera	Formicidae			2	0.0897	0.0876	0.0021
1	2013-08-26	2	10	43	Orthoptera	Gryllidae			2	0.0745	0.074	0.0005
1	2013-09-12	2	0	8	Psocoptera				1	0.0974	0.0971	0.0003
1	2013-09-12	2	0	16	Hymenoptera	Formicidae			2	0.0754	0.0706	0.0048
1	2013-09-12	2	0	16	Blattodea				6	0.0645	0.0573	0.0072
1	2013-09-12	2	0	16	Orthoptera	Tetragidae			2	0.0841	0.0833	0.0008
1	2013-09-12	2	0	16	Lepidoptera (larvae)				1	0.0745	0.0739	0.0006
1	2013-09-12	2	0	25	Orthoptera	Tetragidae			13	0.085	0.0761	0.0089
1	2013-09-12	2	0	25	Orthoptera	Gryllidae			2	0.0912	0.0891	0.0021
1	2013-09-12	2	0	25	Blattodea				1	0.0899	0.0815	0.0084
1	2013-09-12	2	0	25	Coleoptera	Staphylinidae			2	0.0938	0.0873	0.0065
1	2013-09-12	2	0	25	Dermaptera				1	0.0527	0.0493	0.0034
1	2013-09-12	2	0	33	Blattodea				7	0.1543	0.0755	0.0788
1	2013-09-12	2	0	33	Hymenoptera	Formicidae			5	0.076	0.0747	0.0013
1	2013-09-12	2	0	33	Lepidoptera (larvae)				1	0.0686	0.0685	0.0001
1	2013-09-12	2	0	47	Araneae	Sparassidae	Heteropoda		1	0.0368	0.0339	0.0029
1	2013-09-12	2	0	47	Araneae	Lycosidae	Pardosa sumatrana		1	0.0415	0.0408	0.0007
1	2013-09-12	2	0	47	Isopoda				1	0.0862	0.0809	0.0053
1	2013-09-12	2	0	47	Blattodea				2	0.0753	0.0739	0.0014
1	2013-09-12	2	0	47	Coleoptera	Silphidae			3	0.0643	0.064	0.0003
1	2013-09-12	2	0	47	Psocoptera				1	0.091	0.0907	0.0003
1	2013-09-12	2	2	6	Blattodea				11	0.0858	0.0762	0.0096
1	2013-09-12	2	2	6	Orthoptera	Gryllidae			2	0.0886	0.0881	0.0005
1	2013-09-12	2	2	6	Amphipoda				1	0.0844	0.0817	0.0027
1	2013-09-12	2	2	6	Araneae	Lycosidae	Pardosa sumatrana		1	0.03	0.0297	0.0003
1	2013-09-12	2	2	27	Hymenoptera	Formicidae			1	0.0774	0.0774	0
1	2013-09-12	2	2	27	Blattodea				1	0.0979	0.09	0.0079
1	2013-09-12	2	2	42	Hymenoptera	Formicidae			5	0.1081	0.0882	0.0199
1	2013-09-12	2	2	42	Blattodea				6	0.1054	0.1006	0.0048
1	2013-09-12	2	2	42	Isopoda				1	0.0716	0.0709	0.0007
1	2013-09-12	2	2	42	Isoptera				4	0.1046	0.102	0.0026
1	2013-09-12	2	2	42	Araneae	Sparassidae	Heteropoda		1	0.0479	0.0335	0.0144
1	2013-09-12	2	2	42	Araneae	Agelenidae	Draconarius		1	0.0874	0.0867	0.0007
1	2013-09-12	2	2	42	Araneae	Lycosidae	Pardosa sumatrana		4	0.0315	0.0291	0.0024
1	2013-09-12	2	2	42	Coleoptera	Carabidae			5	0.0866	0.0865	0.0001
1	2013-09-12	2	5	7	Hymenoptera	Formicidae			1	0.093	0.0925	0.0005
1	2013-09-12	2	5	7	Isopoda				2	0.0944	0.0928	0.0016
1	2013-09-12	2	5	7	Amphipoda				1	0.1169	0.1162	0.0007
1	2013-09-12	2	5	7	Heteroptera				1	0.0824	0.0739	0.0085
1	2013-09-12	2	5	7	Orthoptera	Gryllidae			1	0.0922	0.0916	0.0006
1	2013-09-12	2	5	7	Acari				1	0.0963	0.0961	0.0002
1	2013-09-12	2	5	7	Araneae	Agelenidae	Draconarius		1	0.0951	0.0944	0.0007
1	2013-09-12	2	5	7	Araneae	Agelenidae	Draconarius		1	0.0685	0.0685	0
1	2013-09-12	2	5	7	Araneae	Sparassidae	Heteropoda		1	0.0245	0.0231	0.0014
1	2013-09-12	2	5	45	Chilopoda				1	0.0839	0.0651	0.0188
1	2013-09-12	2	5	45	Orthoptera		Gryllidae		3	0.061	0.0571	0.0039
1	2013-09-12	2	5	45	Hymenoptera	Formicidae			1	0.0698	0.0698	0
1	2013-09-12	2	5	45	Araneae	Sparassidae	Heteropoda		1	0.0245	0.0228	0.0017
1	2013-09-12	2	5	45	Araneae	Agelenidae	Draconarius		1	0.0635	0.0613	0.0022
1	2013-09-12	2	5	50	Hymenoptera	Formicidae			9	0.0634	0.0618	0.0016
1	2013-09-12	2	5	50	Orthoptera	Gryllidae			10	0.0648	0.0574	0.0074
1	2013-09-12	2	5	50	Coleoptera	Silphidae			2	0.0539	0.0527	0.0012
1	2013-09-12	2	5	50	Araneae	Agelenidae	Draconarius		1	0.0625	0.0613	0.0012
1	2013-09-12	2	10	4	Hymenoptera	Formicidae			6	0.072	0.0541	0.0179
1	2013-09-12	2	10	4	Isopoda				5	0.0644	0.0639	0.0005
1	2013-09-12	2	10	4	Heteroptera				1	0.0734	0.07	0.0034
1	2013-09-12	2	10	4	Araneae	Sparassidae	Heteropoda		3	0.0774	0.0635	0.0139
1	2013-09-12	2	10	4	Araneae	Agelenidae	Draconarius		1	0.0712	0.0693	0.0019
1	2013-09-12	2	10	4	Araneae	Agelenidae	Draconarius		7	0.0779	0.0642	0.0137
1	2013-09-12	2	10	27	Hymenoptera	Formicidae			5	0.0558	0.0491	0.0067
1	2013-09-12	2	10	27	Phasmatodea				1	0.0579	0.0549	0.003
1	2013-09-12	2	10	27	Isopoda				2	0.0513	0.0482	0.0031
1	2013-09-12	2	10	27	Chilopoda				1	0.0635	0.0604	0.0031
1	2013-09-12	2	10	39	Orthoptera	Gryllidae			10	0.0797	0.0686	0.0111
1	2013-09-12	2	10	39	Isopoda				4	0.0656	0.0592	0.0064
1	2013-09-12	2	10	39	Hymenoptera	Formicidae			2	0.0695	0.056	0.0135
1	2013-09-12	2	10	39	Araneae	Agelenidae	Draconarius		1	0.0606	0.0581	0.0025
1	2013-09-12	2	10	39	Lepidoptera (larvae)				1	0.0577	0.0552	0.0025
1	2013-09-12	2	10	4	Araneae	Lycosidae	Spider 23		1	0.0607	0.0588	0.0019
1	2013-09-12	2	10	4	Araneae	Theridiiae	Spider 40		1	0.0574	0.0569	0.0005
1	2013-10-02	2	0	3	Araneae	Sparassidae	Heteropoda		1	0.0894	0.0646	0.0248
1	2013-10-02	2	0	3	Orthoptera	Tetragidae			4	0.0314	0.0302	0.0012
1	2013-10-02	2	0	3	Orthoptera	Gryllidae			1	0.0298	0.0266	0.0032
1	2013-10-02	2	0	3	Hymenoptera	Formicidae			1	0.0515	0.0515	0
1	2013-10-02	2	0	30	Orthoptera	Tetragidae			2	0.0456	0.0439	0.0017
1	2013-10-02	2	0	30	Orthoptera	Gryllidae			1	0.0836	0.0823	0.0013
1	2013-10-02	2	0	30	Dermaptera				1	0.081	0.0791	0.0019
1	2013-10-02	2	0	30	Blattodea				1	0.0749	0.0746	0.0003
1	2013-10-02	2	0	30	Homoptera				2	0.0839	0.0836	0.0003
1	2013-10-02	2	0	30	Psocoptera				2	0.0781	0.0779	0.0002
1	2013-10-02	2	0	13	Blattodea	Blattidae			9	0.4122	0.1656	0.2466
1	2013-10-02	2	0	13	Araneae	Sparassidae	Heteropoda		2	0.1033	0.0703	0.033
1	2013-10-02	2	0	13	Orthoptera	Gryllidae			2	0.0273	0.0248	0.0025
1	2013-10-02	2	0	13	Coleoptera	Staphylinidae			1	0.0432	0.0431	0.0001
1	2013-10-02	2	0	40	Hymenoptera	Formicidae			1	0.0533	0.0533	0
1	2013-10-02	2	0	41	Blattodea				5	0.0742	0.0681	0.0061
1	2013-10-02	2	0	41	Hymenoptera	Formicidae			2	0.0822	0.0791	0.0031
1	2013-10-02	2	0	41	Araneae	Lycosidae	Pardosa sumatrana		1	0.0308	0.0295	0.0013
1	2013-10-02	2	2	15	Hymenoptera	Formicidae			3	0.0483	0.0474	0.0009
1	2013-10-02	2	2	26	Orthoptera	Gryllidae			4	0.0866	0.0842	0.0024
1	2013-10-02	2	2	26	Blattodea				3	0.0798	0.0757	0.0041
1	2013-10-02	2	2	26	Hymenoptera	Formicidae			3	0.0784	0.0705	0.0079
1	2013-10-02	2	2	26	Araneae	Gnaphosidae	Spider 16		3	0.0942	0.094	0.0002
1	2013-10-02	2	2	47	Blattodea				4	0.0843	0.0786	0.0057
1	2013-10-02	2	2	47	Hymenoptera	Formicidae			2	0.0832	0.0831	0.0001
1	2013-10-02	2	5	33	Araneae	Linyphiidae	Spider 39		2	0.1085	0.107	0.0015
1	2013-10-02	2	5	12	Amphipoda				4	0.0615	0.0571	0.0044
1	2013-10-02	2	5	12	Isopoda				1	0.0595	0.0572	0.0023
1	2013-10-02	2	5	12	Hymenoptera	Formicidae			42	0.0707	0.0583	0.0124
1	2013-10-02	2	5	12	Isoptera				7	0.0592	0.0546	0.0046
1	2013-10-02	2	5	12	Araneae	Agelenidae	Draconarius		1	0.0574	0.0538	0.0036
1	2013-10-02	2	5	20	Amphipoda				3	0.0557	0.0525	0.0032
1	2013-10-02	2	5	20	Isopoda				1	0.0473	0.0456	0.0017
1	2013-10-02	2	5	20	Blattodea				1	0.0392	0.0373	0.0019
1	2013-10-02	2	5	20	Orthoptera	Gryllidae			5	0.0533	0.0314	0.0219
1	2013-10-02	2	5	20	Hymenoptera	Formicidae			7	0.0488	0.0454	0.0034
1	2013-10-02	2	5	20	Araneae	Agelenidae	Draconarius		3	0.047	0.0369	0.0101
1	2013-10-02	2	5	20	Araneae	Agelenidae	Draconarius		3	0.0606	0.0513	0.0093
1	2013-10-02	2	5	20	Araneae	Salticidae	Spider 6		1	0.0452	0.0387	0.0065
1	2013-10-02	2	5	33	Isopoda				6	0.0657	0.0454	0.0203
1	2013-10-02	2	5	33	Blattodea				3	0.0596	0.0544	0.0052
1	2013-10-02	2	5	33	Araneae	Sparassidae	Heteropoda		2	0.0633	0.0456	0.0177
1	2013-10-02	2	5	33	Hymenoptera	Formicidae			4	0.0667	0.0638	0.0029
1	2013-10-02	2	5	33	Orthoptera	Gryllidae			4	0.0868	0.0804	0.0064
1	2013-10-02	2	5	33	Amphipoda				1	0.0879	0.0868	0.0011
1	2013-10-02	2	5	33	Chilopoda				1	0.0564	0.0526	0.0038
1	2013-10-02	2	5	33	Araneae	Agelenidae	Draconarius		4	0.0575	0.05	0.0075
1	2013-10-02	2	10	1	Isopoda				33	0.1277	0.0635	0.0642
1	2013-10-02	2	10	1	Hymenoptera	Formicidae			5	0.0652	0.0491	0.0161
1	2013-10-02	2	10	1	Orthoptera	Tetragidae			1	0.0713	0.0697	0.0016
1	2013-10-02	2	10	1	Araneae	Sparassidae	Heteropoda		1	0.035	0.0276	0.0074
1	2013-10-02	2	10	1	Isoptera				2	0.0652	0.0641	0.0011
1	2013-10-02	2	10	1	Araneae	Agelenidae	Draconarius		1	0.0728	0.0707	0.0021
1	2013-10-02	2	10	29	Araneae	Sparassidae	Heteropoda		3	0.0624	0.0361	0.0263
1	2013-10-02	2	10	29	Araneae	Agelenidae	Draconarius		2	0.0493	0.0479	0.0014
1	2013-10-02	2	10	29	Hymenoptera	Formicidae			1	0.0522	0.0462	0.006
1	2013-10-02	2	10	29	Heteroptera				1	0.0566	0.0565	0.0001
1	2013-10-02	2	10	29	Isopoda				1	0.064	0.0638	0.0002
1	2013-10-02	2	10	38	Araneae	Sparassidae	Heteropoda		2	0.0777	0.043	0.0347
1	2013-10-02	2	10	38	Isopoda				3	0.079	0.0678	0.0112
1	2013-10-02	2	10	38	Hymenoptera	Formicidae			6	0.061	0.0572	0.0038
1	2013-10-02	2	10	38	Orthoptera	Eumastacoidea			1	0.0651	0.0611	0.004
1	2013-10-02	2	10	38	Coleoptera	Carabidae			1	0.0693	0.0601	0.0092
1	2013-10-02	2	10	38	Araneae	Agelenidae	Draconarius		4	0.0986	0.0887	0.0099
1	2013-10-02	2	10	38	Araneae	Agelenidae	Draconarius		1	0.0775	0.0737	0.0038
1	2013-10-02	2	10	38	Araneae	Sparassidae	Heteropoda		1	0.0346	0.0292	0.0054
2	2013-11-28	1	0	14	Orthoptera	Gryllidae			6	0.10534	0.0787	0.02664
2	2013-11-28	1	0	14	Orthoptera	Tetragidae			1	0.05092	0.05	0.00092
2	2013-11-28	1	0	14	Araneae	Lycosidae	Spider 23		1	0.047	0.0425	0.0045
2	2013-11-28	1	0	42	Blattodea				9	0.33216	0.12823	0.20393
2	2013-11-28	1	0	42	Orthoptera	Gryllidae			2	0.049	0.04169	0.00731
2	2013-11-28	1	0	42	Dermaptera				1	0.04278	0.04122	0.00156
2	2013-11-28	1	0	42	Lepidoptera (larvae)				1	0.06858	0.0675	0.00108
2	2013-11-28	1	0	42	Araneae	Oecobiidae	Spider 35		1	0.0459	0.0388	0.0071
2	2013-11-28	1	0	31	Blattodea				1	0.06554	0.06233	0.00321
2	2013-11-28	1	0	31	Orthoptera	Gryllidae			1	0.02445	0.02209	0.00236
2	2013-11-28	1	0	31	Araneae	Sparassidae	Heteropoda		1	0.16211	0.12246	0.03965
2	2013-11-28	1	0	31	Araneae	Corinnidae	Spider 55		1	0.05706	0.05453	0.00253
2	2013-11-28	1	0	5	Araneae	Oecobiidae	Spider 45		1	0.0482	0.0481	0.0001
2	2013-11-28	1	0	26	Orthoptera	Tetragidae			1	0.02436	0.02375	0.00061
2	2013-11-28	1	10	21	Diplopoda				2	0.05351	0.02717	0.02634
2	2013-11-28	1	10	21	Heteroptera				2	0.09645	0.0728	0.02365
2	2013-11-28	1	10	21	Isopoda				11	0.0797	0.04116	0.03854
2	2013-11-28	1	10	21	Opiliones	Phalangodidae			2	0.05364	0.05086	0.00278
2	2013-11-28	1	10	21	Araneae	Agelenidae	Draconarius		5	0.057	0.0474	0.0096
2	2013-11-28	1	10	21	Araneae	Lycosidae	Spider 23		2	0.0494	0.0457	0.0037
2	2013-11-28	1	10	21	Araneae	Theridiiae	Spider 50		1	0.0482	0.048	0.0002
2	2013-11-28	1	10	21	Araneae	Salticidae	Spider 2		1	0.0628	0.0625	0.0003
2	2013-11-28	1	10	21	Araneae	Linyphiidae	Spider 46		1	0.0382	0.038	0.0002
2	2013-11-28	1	10	36	Heteroptera				1	0.07882	0.06059	0.01823
2	2013-11-28	1	10	36	Orthoptera	Gryllidae			1	0.06133	0.05787	0.00346
2	2013-11-28	1	10	36	Opiliones	Phalangodidae			2	0.07389	0.06969	0.0042
2	2013-11-28	1	10	36	Pseudoscorpionida				1	0.06116	0.0605	0.00066
2	2013-11-28	1	10	36	Isopoda				2	0.06392	0.05996	0.00396
2	2013-11-28	1	10	36	Coleoptera	Silphidae			1	0.04746	0.04484	0.00262
2	2013-11-28	1	10	36	Hymenoptera	Formicidae			11	0.05641	0.05269	0.00372
2	2013-11-28	1	10	36	Araneae	Agelenidae	Draconarius		3	0.0525	0.0455	0.007
2	2013-11-28	1	10	36	Araneae	Lycosidae	Spider 13		2	0.0639	0.0499	0.014
2	2013-11-28	1	10	16	Isopoda				2	0.06209	0.05751	0.00458
2	2013-11-28	1	10	16	Hymenoptera	Formicidae			26	0.04367	0.04138	0.00229
2	2013-11-28	1	10	16	Heteroptera				1	0.02748	0.02695	0.00053
2	2013-11-28	1	10	16	Araneae	Amaurobiidae	Spider 33		2	0.0422	0.0412	0.001
2	2013-11-28	1	10	16	Araneae	Lycosidae	Spider 23		2	0.0575	0.057	0.0005
2	2013-11-28	1	2	7	Isopoda				1	0.05994	0.05772	0.00222
2	2013-11-28	1	2	7	Araneae	Sparassidae	Heteropoda		2	0.1127	0.08069	0.03201
2	2013-11-28	1	2	7	Araneae	Theridiiae	Spider 60		1	0.063	0.0567	0.0063
2	2013-11-28	1	2	7	Araneae	Salticidae	Spider 10		2	0.0674	0.066	0.0014
2	2013-11-28	1	2	7	Araneae	Amaurobiidae	Spider 36		1	0.0749	0.0735	0.0014
2	2013-11-28	1	2	24	-							0
2	2013-11-28	1	2	30	-							0
2	2013-11-28	1	5	43	Heteroptera				2	0.06675	0.05293	0.01382
2	2013-11-28	1	5	43	Hymenoptera	Formicidae			1	0.05486	0.04943	0.00543
2	2013-11-28	1	5	43	Isopoda				8	0.08378	0.05494	0.02884
2	2013-11-28	1	5	43	Coleoptera (larvae)	Silphidae			1	0.05707	0.05629	0.00078
2	2013-11-28	1	5	43	Pseudoscorpionida				1	0.02069	0.02041	0.00028
2	2013-11-28	1	5	43	Opiliones	Phalangiidae			1	0.0633	0.06175	0.00155
2	2013-11-28	1	5	43	Araneae	Agelenidae	Draconarius		2	0.0495	0.0396	0.0099
2	2013-11-28	1	5	43	Araneae	Theridiiae	Spider 60		1	0.0633	0.0539	0.0094
2	2013-11-28	1	5	43	Araneae	Agelenidae	Draconarius		1	0.0501	0.047	0.0031
2	2013-11-28	1	5	43	Araneae	Theridiiae	Spider 49		1	0.0756	0.075	0.0006
2	2013-11-28	1	5	22	Orthoptera	Gryllidae			1	0.06747	0.06032	0.00715
2	2013-11-28	1	5	22	Heteroptera				1	0.05734	0.05653	0.00081
2	2013-11-28	1	5	22	Hymenoptera	Formicidae			1	0.04729	0.04636	0.00093
2	2013-11-28	1	5	22	Isopoda				5	0.06276	0.04606	0.0167
2	2013-11-28	1	5	22	Araneae	Sparassidae	Heteropoda		1	0.05974	0.05516	0.00458
2	2013-11-28	1	5	22	Araneae	Oecobiidae	Spider 63		1	0.0523	0.052	0.0003
2	2013-11-28	1	5	22	Araneae	Agelenidae	Draconarius		1	0.0503	0.0474	0.0029
2	2013-11-28	1	5	22	Araneae	Agelenidae	Draconarius		1	0.0606	0.0559	0.0047
2	2013-11-28	1	5	10	Heteroptera				2	0.04216	0.02784	0.01432
2	2013-11-28	1	5	10	Orthoptera	Gryllidae			1	0.05658	0.0436	0.01298
2	2013-11-28	1	5	10	Diplopoda				1	0.03172	0.02648	0.00524
2	2013-11-28	1	10	21	Araneae	Lycosidae	Spider 23		3	0.0706	0.0608	0.0098
2	2013-11-28	1	10	21	Araneae	Amaurobiidae	Spider 42		7	0.0573	0.055	0.0023
2	2013-11-28	1	5	22	Araneae	Sparassidae	Spider 21		1	0.0758	0.0728	0.003
2	2013-11-28	1	5	22	Araneae	Theridiiae	Spider 7		1	0.0759	0.074	0.0019
2	2013-11-28	1	5	22	Araneae	Amaurobiidae	Spider 25		1	0.0661	0.0616	0.0045
2	2013-12-12	1	0	6	Araneae	Gnaphosidae	Spider 16		2	0.0695	0.0688	0.0007
2	2013-11-28	1	5	43	Araneae	Lycosidae	Spider 13		2	0.0629	0.0607	0.0022
2	2013-12-12	1	5	45	Araneae	Theridiiae	Spider 40		1	0.071	0.0705	0.0005
2	2013-12-12	1	5	45	Araneae	Oecobiidae	Spider 30		1	0.04097	0.03613	0.00484
2	2013-12-12	1	0	33	Coleoptera (larvae)	Eulichadidae	Eulichas		1	0.58691	0.13064	0.45627
2	2013-12-12	1	0	33	Blattodea				6	0.26984	0.13739	0.13245
2	2013-12-12	1	0	33	Dermaptera				2	0.09698	0.07643	0.02055
2	2013-12-12	1	0	33	Heteroptera				1	0.02334	0.02192	0.00142
2	2013-12-12	1	0	33	Araneae	Theridiiae	Spider 56		1	0.06164	0.05364	0.008
2	2013-12-12	1	0	6	Blattodea				7	0.19693	0.12845	0.06848
2	2013-12-12	1	0	6	Orthoptera	Tetragidae			1	0.05012	0.04872	0.0014
2	2013-12-12	1	0	6	Orthoptera	Gryllidae			1	0.0618	0.05703	0.00477
2	2013-12-12	1	0	6	Coleoptera (larvae)	Staphylinidae			5	0.03279	0.02738	0.00541
2	2013-12-12	1	0	6	Araneae	Corinnidae	Spider 58		1	0.05742	0.05445	0.00297
2	2013-12-12	1	0	20	Blattodea				4	0.29383	0.13004	0.16379
2	2013-12-12	1	0	20	Orthoptera	Gryllidae			3	0.07408	0.06513	0.00895
2	2013-12-12	1	0	20	Orthoptera	Tetragidae			2	0.02432	0.02148	0.00284
2	2013-12-12	1	0	20	Amphipoda				1	0.027	0.02602	0.00098
2	2013-12-12	1	0	20	Araneae	Salticidae	Spider 10		1	0.0558	0.0543	0.0015
2	2013-12-12	1	0	20	Araneae	Salticidae	Spider 9		1	0.0679	0.0674	0.0005
2	2013-12-12	1	0	43	Blattodea				7	0.50363	0.12404	0.37959
2	2013-12-12	1	0	43	Orthoptera	Gryllidae			1	0.03472	0.02882	0.0059
2	2013-12-12	1	5	45	Araneae	Oecobiidae	Spider 61		1	0.0552	0.0537	0.0015
2	2013-12-12	1	0	43	Araneae	Amaurobiidae	Spider 36		1	0.0592	0.0587	0.0005
2	2013-12-12	1	0	24	Blattodea				2	0.36744	0.13784	0.2296
2	2013-12-12	1	0	24	Orthoptera	Gryllidae			2	0.02306	0.01954	0.00352
2	2013-12-12	1	10	18	Hymenoptera	Formicidae			147	0.05615	0.04423	0.01192
2	2013-12-12	1	10	18	Isopoda				4	0.06515	0.04356	0.02159
2	2013-12-12	1	10	18	Pseudoscorpionida				2	0.04927	0.04897	0.0003
2	2013-12-12	1	10	18	Chilopoda				1	0.02616	0.02605	0.00011
2	2013-12-12	1	10	18	Heteroptera				1	0.05555	0.05504	0.00051
2	2013-12-12	1	10	18	Collembola				1	0.02505	0.02496	9e-05
2	2013-12-12	1	10	18	Araneae	Sparassidae	Heteropoda		1	0.11753	0.02373	0.0938
2	2013-12-12	1	10	18	Araneae	Agelenidae	Draconarius		1	0.053	0.0519	0.0011
2	2013-12-12	1	10	18	Araneae	Agelenidae	Draconarius		1	0.0552	0.0522	0.003
2	2013-12-12	1	10	18	Araneae	Agelenidae	Draconarius		1	0.0444	0.0421	0.0023
2	2013-12-12	1	10	18	Araneae	Lycosidae	Spider 23		2	0.0575	0.057	0.0005
2	2013-12-12	1	10	9	Heteroptera				4	0.12192	0.07996	0.04196
2	2013-12-12	1	10	9	Diplopoda				2	0.03065	0.02875	0.0019
2	2013-12-12	1	10	9	Chilopoda				1	0.09164	0.05432	0.03732
2	2013-12-12	1	10	9	Isopoda				1	0.05497	0.05204	0.00293
2	2013-12-12	1	10	9	Araneae	Agelenidae	Draconarius		1	0.0542	0.051	0.0032
2	2013-12-12	1	10	50	Heteroptera				1	0.0917	0.07618	0.01552
2	2013-12-12	1	10	50	Hymenoptera	Formicidae			1	0.03697	0.0242	0.01277
2	2013-12-12	1	10	50	Blattodea				1	0.03397	0.0245	0.00947
2	2013-12-12	1	10	50	Orthoptera	Gryllidae			1	0.02415	0.02252	0.00163
2	2013-12-12	1	2	17	Heteroptera				19	0.33983	0.15199	0.18784
2	2013-12-12	1	2	17	Isopoda				1	0.05208	0.04892	0.00316
2	2013-12-12	1	2	17	Blattodea				1	0.02786	0.02163	0.00623
2	2013-12-12	1	2	17	Orthoptera	Tetragidae			1	0.05262	0.05006	0.00256
2	2013-12-12	1	2	17	Homoptera				1	0.04744	0.03712	0.01032
2	2013-12-12	1	10	18	Araneae	Salticidae	Spider 18		2	0.0417	0.0389	0.0028
2	2013-12-12	1	2	17	Araneae	Theridiiae	Spider 3		1	0.0518	0.051	0.0008
2	2013-12-12	1	2	28	Diplopoda				2	0.1129	0.04856	0.06434
2	2013-12-12	1	2	28	Collembola				1	0.02341	0.02329	0.00012
2	2013-12-12	1	2	28	Hymenoptera	Formicidae			1	0.02635	0.02483	0.00152
2	2013-12-12	1	2	28	Araneae	Agelenidae	Draconarius		1	0.0477	0.0442	0.0035
2	2013-12-12	1	2	12	Opiliones	Phalangiidae			2	0.02977	0.02305	0.00672
2	2013-12-12	1	2	12	Coleoptera	Carabidae			1	0.02512	0.02428	0.00084
2	2013-12-12	1	2	12	Collembola				1	0.04934	0.04926	8e-05
2	2013-12-12	1	2	12	Araneae	Sparassidae	Heteropoda		1	0.19006	0.13372	0.05634
2	2013-12-12	1	2	12	Araneae	Theridiiae	Spider 7		1	0.0475	0.0438	0.0037
2	2013-12-12	1	5	26	Heteroptera				5	0.07368	0.04203	0.03165
2	2013-12-12	1	5	26	Diplopoda				1	0.04218	0.02205	0.02013
2	2013-12-12	1	5	26	Isopoda				3	0.04112	0.02387	0.01725
2	2013-12-12	1	5	26	Orthoptera	Gryllidae			1	0.05828	0.05469	0.00359
2	2013-12-12	1	5	26	Hymenoptera	Formicidae			4	0.02548	0.02504	0.00044
2	2013-12-12	1	5	26	Araneae	Sparassidae	Heteropoda		1	0.2335	0.1467	0.0868
2	2013-12-12	1	5	26	Araneae	Agelenidae	Draconarius		4	0.0435	0.0395	0.004
2	2013-12-12	1	5	26	Araneae	Lycosidae	Spider 23		5	0.0486	0.0426	0.006
2	2013-12-12	1	5	26	Araneae	Salticidae	Spider 2		2	0.0653	0.0643	0.001
2	2013-12-12	1	5	26	Araneae	Salticidae	Spider 9		2	0.0746	0.0739	0.0007
2	2013-12-12	1	5	45	Heteroptera				9	0.23135	0.12219	0.10916
2	2013-12-12	1	5	45	Blattodea				5	0.09315	0.04838	0.04477
2	2013-12-12	1	5	45	Isopoda				5	0.09564	0.07024	0.0254
2	2013-12-12	1	5	45	Chilopoda				1	0.05869	0.05848	0.00021
2	2013-12-12	1	5	45	Orthoptera	Gryllidae			1	0.0259	0.0238	0.0021
2	2013-12-12	1	5	45	Hymenoptera	Formicidae			26	0.0662	0.05899	0.00721
2	2013-12-12	1	5	45	Araneae	Agelenidae	Draconarius		2	0.0516	0.0473	0.0043
2	2013-12-12	1	5	45	Araneae	Agelenidae	Draconarius		1	0.0556	0.0551	0.0005
2	2013-12-12	1	5	45	Araneae	Lycosidae	Spider 23		1	0.0547	0.0533	0.0014
2	2013-12-12	1	5	45	Araneae	Salticidae	Spider 10		1	0.0573	0.0568	0.0005
2	2013-12-12	1	5	8	Diplopoda				1	0.07684	0.04494	0.0319
2	2013-12-12	1	5	8	Amphipoda				1	0.0648	0.0645	0.0003
2	2013-12-12	1	10	18	Araneae	Theridiiae	Spider 65		2	0.0372	0.0351	0.0021
2	2013-12-12	1	10	18	Araneae	Amaurobiidae	Spider 25		2	0.0606	0.0575	0.0031
2	2013-12-12	1	5	45	Araneae	Lycosidae	Spider 23		4	0.0651	0.0597	0.0054
2	2013-12-27	1	0	18	Blattodea				1	0.13541	0.0806	0.05481
2	2013-12-27	1	0	18	Heteroptera				3	0.06007	0.04477	0.0153
2	2013-12-27	1	0	18	Orthoptera	Gryllidae			1	0.01904	0.01688	0.00216
2	2013-12-27	1	0	18	Araneae	Sparassidae	Heteropoda		1	0.1399	0.0883	0.0516
2	2013-12-27	1	0	22	Orthoptera	Gryllidae			1	0.02955	0.02737	0.00218
2	2013-12-27	1	0	22	Lepidoptera (larvae)				1	0.0275	0.0248	0.0027
2	2013-12-27	1	0	22	Araneae	Oecobiidae	Spider 62		1	0.02379	0.02156	0.00223
2	2013-12-27	1	0	44	Orthoptera	Gryllidae			3	0.06041	0.0415	0.01891
2	2013-12-27	1	0	44	Microcoryphia				1	0.0394	0.0389	0.0005
2	2013-12-27	1	0	39	Orthoptera	Gryllidae			1	0.03413	0.03314	0.00099
2	2013-12-27	1	0	39	Plechoptera				1	0.027	0.02618	0.00082
2	2013-12-27	1	5	48	Araneae	Sparassidae	Heteropoda		3	0.0849	0.0708	0.0141
2	2013-12-27	1	0	39	Araneae	Corinnidae	Spider 59		1	0.0859	0.0853	0.0006
2	2013-12-27	1	0	8	Blattodea				2	0.06791	0.06421	0.0037
2	2013-12-27	1	0	8	Araneae	Linyphiidae	Spider 28		3	0.06411	0.05975	0.00436
2	2013-12-27	1	0	8	Araneae	Oecobiidae	Spider 63		1	0.0531	0.0523	0.0008
2	2013-12-27	1	0	8	Collembola				1	0.0579	0.0579	0
2	2013-12-27	1	10	42	Heteroptera				1	0.02481	0.02147	0.00334
2	2013-12-27	1	10	42	Isoptera				4	0.02283	0.01997	0.00286
2	2013-12-27	1	10	42	Pseudoscorpionida				2	0.02426	0.0223	0.00196
2	2013-12-27	1	10	42	Araneae	Agelenidae	Draconarius		1	0.0432	0.0388	0.0044
2	2013-12-27	1	10	11	Heteroptera				1	0.04725	0.03727	0.00998
2	2013-12-27	1	10	11	Chilopoda				1	0.02413	0.02396	0.00017
2	2013-12-27	1	10	11	Isopoda				1	0.03102	0.02595	0.00507
2	2013-12-27	1	10	11	Pseudoscorpionida				1	0.02385	0.02363	0.00022
2	2013-12-27	1	10	11	Collembola				2	0.05459	0.05432	0.00027
2	2013-12-27	1	10	11	Hymenoptera	Formicidae			1	0.02263	0.02256	7e-05
2	2013-12-27	1	10	11	Heteroptera				1	0.0642	0.06357	0.00063
2	2013-12-27	1	10	11	Araneae	Agelenidae	Draconarius		2	0.0584	0.0527	0.0057
2	2013-12-27	1	10	11	Araneae	Agelenidae	Draconarius		3	0.0688	0.0571	0.0117
2	2013-12-27	1	10	11	Araneae	Salticidae	Spider 8		1	0.0459	0.044	0.0019
2	2013-12-27	1	10	23	Isoptera				5	0.02445	0.02161	0.00284
2	2013-12-27	1	10	23	Collembola				1	0.02365	0.02344	0.00021
2	2013-12-27	1	10	23	Isopoda				1	0.02069	0.01982	0.00087
2	2013-12-27	1	10	23	Coleoptera	Dastisidae			1	0.02863	0.02575	0.00288
2	2013-12-27	1	10	23	Araneae	Sparassidae	Heteropoda		1	0.02434	0.02304	0.0013
2	2013-12-27	1	10	23	Araneae	Theridiiae	Spider 49		1	0.05	0.0471	0.0029
2	2013-12-27	1	10	23	Araneae	Agelenidae	Draconarius		1	0.0662	0.0625	0.0037
2	2013-12-27	1	10	23	Araneae	Lycosidae	Spider 27		1	0.0508	0.0504	0.0004
2	2013-12-27	1	10	23	Araneae	Amaurobiidae	Spider 22		1	0.0514	0.0507	0.0007
2	2013-12-27	1	2	16	-							0
2	2013-12-27	1	2	33	Opiliones	Phalangodidae			1	0.02651	0.02474	0.00177
2	2013-12-27	1	2	33	Collembola				4	0.02771	0.02711	0.0006
2	2013-12-27	1	2	33	Lepidoptera				1	0.02352	0.02312	0.0004
2	2013-12-27	1	2	33	Heteroptera				1	0.06025	0.05611	0.00414
2	2013-12-27	1	2	33	Araneae	Agelenidae	Draconarius		1	0.0496	0.046	0.0036
2	2013-12-27	1	5	23	Araneae	Linyphiidae	Spider 46		1	0.0433	0.0428	0.0005
2	2013-12-27	1	2	5	Orthoptera	Tetragidae			1	0.06522	0.0441	0.02112
2	2013-12-27	1	2	5	Blattodea				2	0.02654	0.01788	0.00866
2	2013-12-27	1	2	5	Opiliones	Phalangiidae			1	0.0589	0.05621	0.00269
2	2013-12-27	1	2	5	Coleoptera	Staphylinidae			2	0.04242	0.04166	0.00076
2	2013-12-27	1	2	5	Dermaptera				1	0.02212	0.02169	0.00043
2	2013-12-27	1	2	5	Araneae	Theridiiae	Spider 65		1	0.0465	0.0461	0.0004
2	2013-12-27	1	5	48	Heteroptera				1	0.03763	0.02762	0.01001
2	2013-12-27	1	5	48	Mantodea				1	0.02451	0.02366	0.00085
2	2013-12-27	1	5	48	Araneae	Sparassidae	Heteropoda		2	0.03253	0.02997	0.00256
2	2013-12-27	1	5	48	Araneae	Lycosidae	Spider 20		1	0.0386	0.0383	0.0003
2	2013-12-27	1	5	48	Araneae	Amaurobiidae	Spider 25		1	0.0362	0.0356	0.0006
2	2013-12-27	1	5	13	Opiliones	Phalangiidae			1	0.05164	0.04845	0.00319
2	2013-12-27	1	5	13	Collembola				2	0.02586	0.02539	0.00047
2	2013-12-27	1	5	13	Araneae	Sparassidae	Heteropoda		1	0.02217	0.02059	0.00158
2	2013-12-27	1	5	23	Orthoptera	Gryllidae			1	0.02583	0.02171	0.00412
2	2013-12-27	1	5	23	Collembola				2	0.02535	0.02508	0.00027
2	2013-12-27	1	5	23	Heteroptera				1	0.03117	0.02643	0.00474
2	2013-12-27	1	5	23	Araneae	Lycosidae	Spider 23		1	0.0494	0.0492	0.0002
2	2013-12-27	1	10	42	Araneae	Sparassidae	Spider 5		1	0.0756	0.0721	0.0035
2	2013-12-27	1	10	42	Araneae	Salticidae	Spider 18		1	0.0673	0.0659	0.0014
2	2013-12-27	1	10	42	Araneae	Salticidae	Spider 8		1	0.074	0.0737	0.0003
2	2013-12-27	1	5	23	Araneae	Sparassidae	Heteropoda		1	0.0259	0.02414	0.00176
2	2014-01-09	1	5	1	Araneae	Agelenidae	Draconarius		2	0.0839	0.0822	0.0017
2	2014-01-09	1	0	41	Araneae	Gnaphosidae	Spider 52		1	0.085	0.0847	0.0003
2	2014-01-09	1	5	1	Araneae	Corinnidae	Spider 34		4	0.0534	0.0529	0.0005
2	2014-01-09	1	5	1	Araneae	Sparassidae	Heteropoda		2	0.097	0.0856	0.0114
2	2014-01-09	1	0	12	Orthoptera	Gryllidae			7	0.07621	0.05296	0.02325
2	2014-01-09	1	0	12	Dermaptera				1	0.08918	0.08229	0.00689
2	2014-01-09	1	0	41	Blattodea				3	0.02844	0.01938	0.00906
2	2014-01-09	1	0	41	Orthoptera	Gryllidae			3	0.05803	0.04213	0.0159
2	2014-01-09	1	0	41	Araneae	Oecobiidae	Spider 68		1	0.03252	0.03193	0.00059
2	2014-01-09	1	0	25	Orthoptera	Gryllidae			5	0.05114	0.02916	0.02198
2	2014-01-09	1	0	25	Collembola				7	0.0343	0.03411	0.00019
2	2014-01-09	1	0	25	Plechoptera				1	0.06064	0.05887	0.00177
2	2014-01-09	1	0	3	Blattodea				1	0.08618	0.07074	0.01544
2	2014-01-09	1	0	3	Orthoptera	Gryllidae			1	0.04905	0.04468	0.00437
2	2014-01-09	1	0	3	Araneae	Agelenidae	Draconarius		2	0.1019	0.0982	0.0037
2	2014-01-09	1	0	36	Orthoptera	Gryllidae			2	0.0498	0.04284	0.00696
2	2014-01-09	1	10	1	Lepidoptera (larvae)				1	0.054	0.0531	0.0009
2	2014-01-09	1	10	1	Isoptera				174	0.3391	0.139	0.2001
2	2014-01-09	1	10	30	Isoptera				357	0.5763	0.0972	0.4791
2	2014-01-09	1	10	30	Heteroptera				3	0.0701	0.0408	0.0293
2	2014-01-09	1	10	30	Diplopoda				2	0.0569	0.0516	0.0053
2	2014-01-09	1	10	30	Orthoptera	Gryllidae			1	0.0284	0.0206	0.0078
2	2014-01-09	1	10	30	Blattodea				1	0.0701	0.0621	0.008
2	2014-01-09	1	10	30	Isopoda				1	0.0481	0.0426	0.0055
2	2014-01-09	1	10	30	Opiliones	Phalangodidae			1	0.0611	0.0591	0.002
2	2014-01-09	1	10	30	Araneae	Agelenidae	Draconarius		1	0.0501	0.0466	0.0035
2	2014-01-09	1	10	30	Araneae	Agelenidae	Draconarius		1	0.0347	0.0341	0.0006
2	2014-01-09	1	10	44	Heteroptera				3	0.1329	0.0833	0.0496
2	2014-01-09	1	10	44	Isopoda				5	0.0883	0.0671	0.0212
2	2014-01-09	1	10	44	Opiliones	Phalangodidae			4	0.052	0.0457	0.0063
2	2014-01-09	1	10	44	Isoptera				1	0.0522	0.051	0.0012
2	2014-01-09	1	10	44	Araneae	Agelenidae	Draconarius		4	0.0571	0.047	0.0101
2	2014-01-09	1	10	44	Araneae	Agelenidae	Draconarius		1	0.0526	0.0494	0.0032
2	2014-01-09	1	10	44	Araneae	Lycosidae	Spider 23		1	0.0493	0.0473	0.002
2	2014-01-09	1	10	44	Araneae	Salticidae	Spider 6		2	0.0501	0.0489	0.0012
2	2014-01-09	1	2	2	Araneae	Sparassidae	Heteropoda		2	0.2448	0.1324	0.1124
2	2014-01-09	1	2	2	Blattodea				1	0.274	0.1613	0.1127
2	2014-01-09	1	2	2	Heteroptera				11	0.099	0.0656	0.0334
2	2014-01-09	1	2	2	Isoptera				56	0.1095	0.0424	0.0671
2	2014-01-09	1	2	2	Araneae	Salticidae	Spider 8		1	0.0541	0.0526	0.0015
2	2014-01-09	1	2	2	Araneae	Salticidae	Spider 2		1	0.0564	0.056	0.0004
2	2014-01-09	1	2	31	Hymenoptera	Formicidae			25	0.0678	0.0476	0.0202
2	2014-01-09	1	2	31	Isopoda				1	0.0595	0.0554	0.0041
2	2014-01-09	1	2	31	Orthoptera	Gryllidae			3	0.0617	0.0514	0.0103
2	2014-01-09	1	2	31	Heteroptera				2	0.0896	0.0802	0.0094
2	2014-01-09	1	2	31	Orthoptera	Tetragidae			1	0.0424	0.0405	0.0019
2	2014-01-09	1	2	31	Diplopoda				3	0.0722	0.0306	0.0416
2	2014-01-09	1	2	31	Opiliones	Phalangiidae			1	0.0415	0.0399	0.0016
2	2014-01-09	1	2	31	Coleoptera	Carabidae			1	0.022	0.0213	0.0007
2	2014-01-09	1	2	31	Araneae	Salticidae	Spider 8		1	0.0673	0.0414	0.0259
2	2014-01-09	1	2	31	Araneae	Agelenidae	Draconarius		2	0.0571	0.0509	0.0062
2	2014-01-09	1	2	31	Araneae	Salticidae	Spider 2		1	0.0673	0.0665	0.0008
2	2014-01-09	1	2	18	Isopoda				1	0.0482	0.0479	0.0003
2	2014-01-09	1	5	1	Heteroptera				5	0.0774	0.0348	0.0426
2	2014-01-09	1	5	1	Coleoptera	Dastisidae			2	0.06	0.0516	0.0084
2	2014-01-09	1	5	1	Isopoda				3	0.0725	0.05	0.0225
2	2014-01-09	1	5	1	Opiliones	Phalangiidae			1	0.07	0.067	0.003
2	2014-01-09	1	5	1	Araneae	Sparassidae	Heteropoda		1	0.0841	0.0746	0.0095
2	2014-01-09	1	5	1	Araneae	Agelenidae	Draconarius		4	0.0448	0.0419	0.0029
2	2014-01-09	1	5	1	Araneae	Amaurobiidae	Spider 33		1	0.0502	0.0454	0.0048
2	2014-01-09	1	5	1	Araneae	Agelenidae	Draconarius		1	0.0499	0.0439	0.006
2	2014-01-09	1	5	1	Araneae	Theridiiae	Spider 65		1	0.0462	0.0418	0.0044
2	2014-01-09	1	5	1	Araneae	Lycosidae	Spider 23		1	0.0562	0.0519	0.0043
2	2014-01-09	1	5	1	Araneae	Theridiiae	Spider 15		1	0.0732	0.068	0.0052
2	2014-01-09	1	5	1	Araneae	Gnaphosidae	Spider 16		1	0.0471	0.0426	0.0045
2	2014-01-09	1	5	42	Heteroptera				4	0.08543	0.04945	0.03598
2	2014-01-09	1	5	42	Chilopoda				2	0.0628	0.06186	0.00094
2	2014-01-09	1	5	42	Diplopoda				1	0.06815	0.06274	0.00541
2	2014-01-09	1	5	42	Opiliones	Phalangiidae			1	0.04847	0.04675	0.00172
2	2014-01-09	1	5	42	Opiliones	Phalangodidae			1	0.02584	0.02388	0.00196
2	2014-01-09	1	5	42	Isopoda				4	0.06888	0.05268	0.0162
2	2014-01-09	1	5	42	Collembola				1	0.0535	0.05338	0.00012
2	2014-01-09	1	5	42	Araneae	Corinnidae	Spider 71		1	0.0616	0.0608	0.0008
2	2014-01-09	1	5	42	Araneae	Agelenidae	Draconarius		1	0.0418	0.041	0.0008
2	2014-01-09	1	5	42	Araneae	Agelenidae	Draconarius		2	0.0427	0.0409	0.0018
2	2014-01-09	1	5	42	Araneae	Lycosidae	Spider 23		4	0.0642	0.0608	0.0034
2	2014-01-09	1	5	24	Hymenoptera	Formicidae			2	0.06043	0.05842	0.00201
2	2014-01-09	1	5	1	Araneae	Amaurobiidae	Spider 19		2	0.06	0.0534	0.0066
2	2014-01-09	1	5	1	Araneae	Lycosidae	Spider 23		13	0.0603	0.0401	0.0202
2	2014-01-24	1	0	29	Araneae	Theridiiae	Spider 3		1	0.0877	0.0876	0.0001
2	2014-01-24	1	0	10	Orthoptera	Gryllidae			3	0.0968	0.0861	0.0107
2	2014-01-24	1	0	10	Orthoptera	Tetragidae			2	0.1096	0.0833	0.0263
2	2014-01-24	1	0	10	Blattodea				1	0.0605	0.0564	0.0041
2	2014-01-24	1	0	10	Collembola				19	0.0478	0.0448	0.003
2	2014-01-24	1	0	10	Hymenoptera	Formicidae			2	0.0512	0.0509	0.0003
2	2014-01-24	1	0	13	Coleoptera (larvae)	Eulichadidae	Eulichas		1	0.12783	0.0573	0.07053
2	2014-01-24	1	0	13	Orthoptera	Gryllidae			1	0.03248	0.02338	0.0091
2	2014-01-24	1	0	13	Dermaptera				2	0.05304	0.04538	0.00766
2	2014-01-24	1	0	29	Blattodea				7	0.2473	0.1406	0.1067
2	2014-01-24	1	0	29	Amphipoda				2	0.0669	0.0651	0.0018
2	2014-01-24	1	0	29	Orthoptera	Gryllidae			2	0.0604	0.0483	0.0121
2	2014-01-24	1	0	29	Collembola				10	0.0516	0.0507	0.0009
2	2014-01-24	1	0	29	Araneae	Corinnidae	Spider 64		1	0.0466	0.0417	0.0049
2	2014-01-24	1	0	29	Araneae	Salticidae	Spider 9		1	0.0505	0.0503	0.0002
2	2014-01-24	1	0	40	Opiliones	Phalangiidae			1	0.05693	0.03846	0.01847
2	2014-01-24	1	0	40	Dermaptera				1	0.02441	0.02356	0.00085
2	2014-01-24	1	0	47	Blattodea				2	0.3408	0.1739	0.1669
2	2014-01-24	1	0	47	Orthoptera	Gryllidae			1	0.0556	0.0463	0.0093
2	2014-01-24	1	0	47	Orthoptera	Tetragidae			1	0.0564	0.0418	0.0146
2	2014-01-24	1	0	47	Araneae	Agelenidae	Draconarius		2	0.0839	0.0822	0.0017
2	2014-01-24	1	10	12	Heteroptera				2	0.10243	0.0769	0.02553
2	2014-01-24	1	10	12	Orthoptera	Gryllidae			1	0.0267	0.02531	0.00139
2	2014-01-24	1	10	12	Isopoda				1	0.02689	0.02536	0.00153
2	2014-01-24	1	10	12	Lepidoptera (larvae)				1	0.02413	0.02218	0.00195
2	2014-01-24	1	10	12	Collembola				6	0.02542	0.02427	0.00115
2	2014-01-24	1	10	12	Araneae	Gnaphosidae	Spider 52		1	0.051	0.0435	0.0075
2	2014-01-24	1	10	46	Isopoda				1	0.05079	0.04964	0.00115
2	2014-01-24	1	10	46	Opiliones	Phalangiidae			1	0.05416	0.04979	0.00437
2	2014-01-24	1	10	46	Araneae	Theridiiae	Spider 11		1	0.0608	0.0461	0.0147
2	2014-01-24	1	10	46	Araneae	Agelenidae	Draconarius		1	0.0485	0.0451	0.0034
2	2014-01-24	1	10	46	Araneae	Agelenidae	Draconarius		1	0.0503	0.0475	0.0028
2	2014-01-24	1	2	20	Heteroptera				1	0.0579	0.0542	0.0037
2	2014-01-24	1	2	20	Isopoda				2	0.0566	0.0465	0.0101
2	2014-01-24	1	2	20	Araneae	Sparassidae	Heteropoda		2	0.0537	0.0464	0.0073
2	2014-01-24	1	2	20	Araneae	Theridiiae	Spider 49		1	0.0476	0.0466	0.001
2	2014-01-24	1	2	20	Collembola				1	0.0583	0.0583	0
2	2014-01-24	1	2	6	Opiliones	Phalangiidae			1	0.05411	0.0527	0.00141
2	2014-01-24	1	2	6	Hymenoptera	Formicidae			2	0.05356	0.05344	0.00012
2	2014-01-24	1	2	6	Araneae	Lycosidae	Pardosa sumatrana		1	0.0055	0.00448	0.00102
2	2014-01-24	1	2	39	Hymenoptera	Formicidae			1	0.04831	0.04512	0.00319
2	2014-01-24	1	5	29	-							0
2	2014-01-24	1	5	35	Orthoptera	Gryllidae			1	0.06244	0.05186	0.01058
2	2014-01-24	1	5	35	Isopoda				1	0.02577	0.01914	0.00663
2	2014-01-24	1	5	35	Heteroptera				1	0.03606	0.03472	0.00134
2	2014-01-24	1	5	35	Coleoptera	Lampyridae			1	0.0201	0.01946	0.00064
2	2014-01-24	1	5	35	Collembola				5	0.02575	0.02495	0.0008
2	2014-01-24	1	5	35	Araneae	Lycosidae	Spider 24		2	0.0621	0.05	0.0121
2	2014-01-24	1	5	35	Araneae	Amaurobiidae	Spider 12		1	0.0573	0.0565	0.0008
2	2014-01-24	1	5	5	Heteroptera				4	0.0992	0.0543	0.0449
2	2014-01-24	1	5	5	Coleoptera (larvae)	Lucanidae			2	0.0404	0.0341	0.0063
2	2013-12-05	2	5	26	Araneae	Lycosidae	Spider 23		1	0.0931	0.0899	0.0032
2	2013-12-05	2	5	2	Araneae	Salticidae	Spider 6		2	0.0627	0.0605	0.0022
2	2013-12-18	2	5	18	Araneae	Agelenidae	Draconarius		1	0.0463	0.0459	0.0004
2	2013-12-18	2	5	18	Araneae	Agelenidae	Draconarius		1	0.0637	0.0631	0.0006
2	2013-12-05	2	5	2	Araneae	Linyphiidae	Spider 70		2	0.0576	0.0569	0.0007
2	2013-12-05	2	5	26	Araneae	Theridiiae	Spider 49		1	0.0673	0.067	0.0003
2	2013-12-18	2	5	18	Araneae	Agelenidae	Draconarius		1	0.046	0.0458	0.0002
2	2013-12-05	2	0	35	Orthoptera	Gryllidae			2	0.06	0.0532	0.0068
2	2013-12-05	2	0	35	Dermaptera				2	0.0455	0.0445	0.001
2	2013-12-05	2	0	35	Orthoptera	Tetragidae			2	0.0438	0.0414	0.0024
2	2013-12-05	2	0	5	Orthoptera	Gryllidae			14	0.2045	0.1091	0.0954
2	2013-12-05	2	0	5	Chilopoda				1	0.118	0.1099	0.0081
2	2013-12-05	2	0	5	Hymenoptera	Formicidae			1	0.0858	0.081	0.0048
2	2013-12-05	2	10	31	Araneae	Sparassidae	Heteropoda		2	0.1944	0.1117	0.0827
2	2013-12-05	2	0	21	Blattodea				8	0.068	0.044	0.024
2	2013-12-05	2	0	21	Orthoptera	Tetragidae			1	0.0573	0.0542	0.0031
2	2013-12-05	2	0	21	Coleoptera	Staphylinidae			1	0.0281	0.0273	0.0008
2	2013-12-05	2	0	46	Blattodea				3	0.0579	0.0501	0.0078
2	2013-12-05	2	0	46	Lepidoptera (larvae)				1	0.0458	0.0391	0.0067
2	2013-12-05	2	0	46	Araneae	Sparassidae	Heteropoda		1	0.0928	0.0833	0.0095
2	2014-01-10	2	10	29	Araneae	Agelenidae	Draconarius		2	0.0583	0.0531	0.0052
2	2013-12-05	2	0	46	Araneae	Agelenidae	Draconarius		1	0.0585	0.056	0.0025
2	2013-12-05	2	0	11	Blattodea	Blattidae			1	1.5802	1.2384	0.3418
2	2013-12-05	2	0	11	Blattodea				7	0.0869	0.069	0.0179
2	2013-12-05	2	0	11	Araneae	Agelenidae	Draconarius		1	0.0619	0.0574	0.0045
2	2013-12-18	2	0	7	Blattodea				4	0.063	0.0557	0.0073
2	2013-12-18	2	0	7	Orthoptera	Gryllidae			1	0.073	0.07	0.003
2	2013-12-18	2	0	7	Isopoda				1	0.0587	0.0558	0.0029
2	2013-12-18	2	0	7	Coleoptera	Dastisidae			1	0.0241	0.0239	0.0002
2	2013-12-18	2	0	7	Plechoptera				1	0.0229	0.0223	0.0006
2	2013-12-18	2	0	20	Blattodea				1	0.0809	0.0732	0.0077
2	2013-12-18	2	0	20	Coleoptera (larvae)	Dastisidae			1	0.0517	0.051	0.0007
2	2013-12-18	2	0	20	Opiliones	Phalangiidae			1	0.041	0.0404	0.0006
2	2013-12-18	2	0	20	Hymenoptera	Formicidae			1	0.0468	0.0466	0.0002
2	2013-12-18	2	0	38	Blattodea				1	0.049	0.0458	0.0032
2	2013-12-18	2	0	38	Araneae	Lycosidae	Pardosa sumatrana		1	0.0087	0.0078	0.0009
2	2013-12-18	2	0	38	Heteroptera		Metrocoris		1	0.0521	0.0519	0.0002
2	2013-12-18	2	0	41	Orthoptera	Gryllidae			1	0.0861	0.0815	0.0046
2	2013-12-18	2	0	41	Araneae	Lycosidae	Pardosa sumatrana		1	0.0049	0.003	0.0019
2	2013-12-18	2	0	28	Opiliones	Phalangiidae			1	0.0643	0.0496	0.0147
2	2013-12-18	2	0	28	Orthoptera	Gryllidae			3	0.0586	0.0533	0.0053
2	2013-12-18	2	0	28	Blattodea				1	0.0513	0.0505	0.0008
2	2014-01-10	2	0	27	Orthoptera	Gryllidae			3	0.056	0.047	0.009
2	2014-01-10	2	0	27	Collembola				8	0.0417	0.0409	0.0008
2	2014-01-10	2	0	27	Blattodea				1	0.0466	0.0445	0.0021
2	2014-01-10	2	0	6	Collembola				33	0.0557	0.0511	0.0046
2	2014-01-10	2	0	6	Isopoda				2	0.0551	0.0519	0.0032
2	2014-01-10	2	0	6	Hymenoptera	Formicidae			3	0.0396	0.0393	0.0003
2	2014-01-10	2	0	6	Diplopoda				1	0.0501	0.0447	0.0054
2	2014-01-10	2	0	6	Araneae	Sparassidae	Heteropoda		2	0.0646	0.0508	0.0138
2	2014-01-10	2	0	6	Orthoptera	Tetragidae			1	0.0739	0.0725	0.0014
2	2014-01-10	2	0	49	Hymenoptera	Formicidae			1	0.0662	0.061	0.0052
2	2014-01-10	2	0	49	Araneae	Agelenidae	Draconarius		3	0.0673	0.065	0.0023
2	2014-01-10	2	0	15	Orthoptera	Gryllidae			6	0.0613	0.0454	0.0159
2	2014-01-10	2	0	15	Blattodea				1	0.0498	0.0462	0.0036
2	2014-01-10	2	0	36	Orthoptera	Gryllidae			4	0.1027	0.0694	0.0333
2	2014-01-10	2	0	36	Orthoptera	Tetragidae			1	0.0455	0.0446	0.0009
2	2014-01-10	2	0	36	Blattodea				1	0.0593	0.054	0.0053
2	2014-01-29	2	0	48	Blattodea				5	0.42	0.1776	0.2424
2	2014-01-29	2	0	48	Araneae	Sparassidae	Heteropoda		2	0.1148	0.0798	0.035
2	2014-01-29	2	0	48	Araneae	Agelenidae	Draconarius		1	0.0513	0.0449	0.0064
2	2014-01-29	2	0	48	Collembola				1	0.039	0.0385	0.0005
2	2014-01-29	2	0	25	Orthoptera	Gryllidae			1	0.0472	0.0439	0.0033
2	2014-01-29	2	0	25	Opiliones	Phalangiidae			1	0.029	0.0281	0.0009
2	2014-01-29	2	0	25	Collembola				15	0.0355	0.0337	0.0018
2	2014-01-29	2	0	13	Isopoda				1	0.0359	0.0344	0.0015
2	2014-01-29	2	0	13	Blattodea				5	0.0995	0.0862	0.0133
2	2014-01-29	2	0	31	Blattodea				2	0.132	0.0635	0.0685
2	2014-01-29	2	0	31	Orthoptera	Tetragidae			1	0.0901	0.0739	0.0162
2	2014-01-29	2	0	31	Orthoptera	Gryllidae			2	0.07	0.065	0.005
2	2014-01-29	2	0	31	Collembola				1	0.0315	0.0314	0.0001
2	2013-12-05	2	10	49	Araneae	Gnaphosidae	Spider 26		1	0.0623	0.0593	0.003
2	2014-01-29	2	0	3	Orthoptera	Gryllidae			2	0.0384	0.0348	0.0036
2	2014-01-29	2	0	3	Isopoda				3	0.0507	0.0415	0.0092
2	2014-01-29	2	0	3	Collembola				3	0.0201	0.0197	0.0004
2	2014-01-29	2	0	3	Araneae	Sparassidae	Heteropoda		1	0.0663	0.055	0.0113
2	2014-01-29	2	0	3	Araneae	Agelenidae	Draconarius		2	0.0674	0.0552	0.0122
2	2014-02-24	2	0	9	Blattodea				8	0.1175	0.0797	0.0378
2	2014-02-24	2	0	9	Hymenoptera	Formicidae			2	0.0856	0.0764	0.0092
2	2014-02-24	2	0	9	Araneae	Sparassidae	Heteropoda		1	0.0946	0.0843	0.0103
2	2014-02-24	2	0	45	Blattodea				2	0.2838	0.113	0.1708
2	2014-02-24	2	0	45	Orthoptera	Tetragidae			1	0.0951	0.0893	0.0058
2	2014-02-24	2	0	45	Araneae	Sparassidae	Heteropoda		1	0.0796	0.0706	0.009
2	2014-02-24	2	0	25	Lepidoptera (larvae)				1	0.0807	0.0717	0.009
2	2014-02-24	2	0	25	Orthoptera	Gryllidae			1	0.0324	0.0282	0.0042
2	2014-02-24	2	0	25	Collembola				3	0.027	0.0262	0.0008
2	2014-02-24	2	0	32	Orthoptera	Tetragidae			1	0.1	0.0804	0.0196
2	2014-02-24	2	0	32	Orthoptera	Gryllidae			2	0.0319	0.0279	0.004
2	2014-02-24	2	0	32	Blattodea				1	0.0528	0.0448	0.008
2	2014-02-24	2	0	32	Collembola				1	0.0245	0.024	0.0005
2	2013-12-05	2	10	49	Orthoptera	Tetragidae			1	0.0329	0.031	0.0019
2	2013-12-05	2	10	49	Isopoda				1	0.0628	0.0607	0.0021
2	2013-12-05	2	10	49	Hymenoptera	Formicidae			1	0.0531	0.053	0.0001
2	2013-12-05	2	10	49	Araneae	Sparassidae	Heteropoda		2	0.0913	0.0856	0.0057
2	2013-12-05	2	10	49	Araneae	Agelenidae	Draconarius		1	0.0653	0.0628	0.0025
2	2013-12-05	2	10	49	Araneae	Agelenidae	Draconarius		1	0.0693	0.0642	0.0051
2	2013-12-05	2	10	6	Opiliones	Phalangiidae			3	0.0592	0.0521	0.0071
2	2013-12-05	2	10	6	Isopoda				2	0.0653	0.0623	0.003
2	2013-12-05	2	10	6	Amphipoda				1	0.0496	0.0489	0.0007
2	2013-12-05	2	10	6	Orthoptera	Gryllidae			1	0.0418	0.041	0.0008
2	2013-12-05	2	10	6	Araneae	Sparassidae	Heteropoda		1	0.0582	0.0418	0.0164
2	2013-12-05	2	10	6	Araneae	Agelenidae	Draconarius		3	0.0749	0.0698	0.0051
2	2013-12-05	2	10	31	Opiliones	Phalangiidae			1	0.0425	0.0379	0.0046
2	2013-12-05	2	10	31	Lepidoptera (larvae)	Geometridae			1	0.0511	0.0508	0.0003
2	2013-12-05	2	10	31	Coleoptera	Cantharidae			1	0.059	0.0589	0.0001
2	2013-12-05	2	10	31	Araneae	Amaurobiidae	Spider 42		6	0.0472	0.0449	0.0023
2	2013-12-05	2	10	31	Araneae	Agelenidae	Draconarius		1	0.0734	0.0708	0.0026
2	2013-12-05	2	10	31	Araneae	Agelenidae	Draconarius		1	0.0381	0.0368	0.0013
2	2013-12-18	2	10	17	Blattodea				1	0.0434	0.0386	0.0048
2	2013-12-18	2	10	17	Amphipoda				3	0.0446	0.0381	0.0065
2	2013-12-18	2	10	33	Orthoptera	Gryllidae			2	0.0875	0.0723	0.0152
2	2013-12-18	2	10	33	Homoptera				2	0.06	0.0497	0.0103
2	2013-12-18	2	10	33	Araneae	Salticidae	Spider 2		1	0.059	0.0565	0.0025
2	2013-12-18	2	10	33	Araneae	Salticidae	Spider 6		3	0.0748	0.073	0.0018
2	2013-12-18	2	10	41	Orthoptera	Gryllidae			1	0.0532	0.0468	0.0064
2	2013-12-18	2	10	41	Araneae	Salticidae	Spider 9		1	0.0608	0.058	0.0028
2	2014-01-10	2	10	29	Coleoptera (larvae)	Dastisidae			10	0.0588	0.0388	0.02
2	2014-01-10	2	10	29	Phasmatodea				2	0.0381	0.0365	0.0016
2	2014-01-10	2	10	29	Homoptera				1	0.0476	0.0473	0.0003
2	2014-01-10	2	10	29	Araneae	Sparassidae	Heteropoda		1	0.0607	0.0578	0.0029
2	2014-01-10	2	10	29	Araneae	Lycosidae	Spider 23		2	0.059	0.0584	0.0006
2	2014-01-10	2	10	29	Araneae	Theridiiae	Spider 60		1	0.0472	0.0464	0.0008
2	2014-01-10	2	10	29	Araneae	Sparassidae	Spider 32		1	0.0647	0.062	0.0027
2	2014-01-10	2	10	38	Orthoptera	Gryllidae			1	0.0821	0.0762	0.0059
2	2014-01-10	2	10	38	Hymenoptera	Formicidae			1	0.0619	0.0464	0.0155
2	2014-01-10	2	10	12	Blattodea				1	0.0596	0.0524	0.0072
2	2014-01-10	2	10	12	Orthoptera	Gryllidae			2	0.058	0.0472	0.0108
2	2014-01-10	2	10	12	Isopoda				1	0.0497	0.049	0.0007
2	2014-01-10	2	10	12	Heteroptera				2	0.0607	0.0596	0.0011
2	2014-01-10	2	10	12	Amphipoda				1	0.0537	0.053	0.0007
2	2014-01-10	2	10	12	Collembola				1	0.0587	0.0587	0
2	2014-01-10	2	10	12	Araneae	Agelenidae	Draconarius		2	0.0691	0.0652	0.0039
2	2014-01-10	2	10	12	Araneae	Amaurobiidae	Spider 33		1	0.0725	0.0708	0.0017
2	2014-01-10	2	10	12	Araneae	Salticidae	Spider 10		1	0.066	0.0637	0.0023
2	2014-01-29	2	10	5	Orthoptera	Gryllidae			3	0.0996	0.0799	0.0197
2	2014-01-29	2	10	5	Hymenoptera	Formicidae			1	0.045	0.0433	0.0017
2	2014-01-29	2	10	5	Isopoda				1	0.0374	0.0363	0.0011
2	2014-01-29	2	10	5	Isoptera				12	0.102	0.087	0.015
2	2014-01-29	2	10	5	Araneae	Agelenidae	Draconarius		4	0.0728	0.0695	0.0033
2	2014-01-29	2	10	27	Opiliones	Phalangiidae			1	0.0714	0.0644	0.007
2	2014-01-29	2	10	27	Coleoptera	Cuculionidae			4	0.0852	0.08	0.0052
2	2014-01-29	2	10	27	Hymenoptera	Formicidae			3	0.1034	0.0861	0.0173
2	2014-01-29	2	10	27	Blattodea				1	0.0307	0.0261	0.0046
2	2014-01-29	2	10	27	Isoptera				4	0.028	0.0256	0.0024
2	2014-01-29	2	10	27	Isopoda				1	0.0333	0.0318	0.0015
2	2014-01-29	2	10	27	Chilopoda				1	0.0435	0.0404	0.0031
2	2014-01-29	2	10	27	Araneae	Sparassidae	Heteropoda		1	0.0721	0.0655	0.0066
2	2014-01-29	2	10	27	Collembola				2	0.0282	0.028	0.0002
2	2014-01-29	2	10	27	Araneae	Agelenidae	Draconarius		2	0.0793	0.0667	0.0126
2	2014-01-29	2	10	27	Araneae	Theridiiae	Spider 3		1	0.0615	0.0551	0.0064
2	2014-01-29	2	10	40	Hymenoptera	Formicidae			1	0.0251	0.025	0.0001
2	2014-02-24	2	10	2	Isopoda				3	0.0564	0.0551	0.0013
2	2014-02-24	2	10	2	Coleoptera (larvae)	Dastisidae			2	0.0484	0.048	0.0004
2	2014-02-24	2	10	2	Orthoptera	Gryllidae			2	0.0674	0.0643	0.0031
2	2014-02-24	2	10	2	Araneae	Gnaphosidae	Spider 16		1	0.0377	0.0369	0.0008
2	2014-02-24	2	10	47	Araneae	Sparassidae	Heteropoda		3	0.1881	0.0973	0.0908
2	2014-02-24	2	10	47	Isoptera				3	0.0409	0.0386	0.0023
2	2014-02-24	2	10	47	Collembola				3	0.0217	0.0211	0.0006
2	2014-02-24	2	10	47	Blattodea				1	0.038	0.0233	0.0147
2	2014-02-24	2	10	47	Araneae	Salticidae	Spider 10		1	0.0648	0.0629	0.0019
2	2014-02-24	2	10	21	Orthoptera	Gryllidae			1	0.1428	0.1158	0.027
2	2014-02-24	2	10	21	Isopoda				3	0.1511	0.1286	0.0225
2	2014-02-24	2	10	21	Amphipoda				1	0.047	0.044	0.003
2	2014-02-24	2	10	21	Chilopoda				1	0.073	0.0653	0.0077
2	2014-02-24	2	10	21	Araneae	Agelenidae	Draconarius		1	0.0683	0.064	0.0043
2	2014-02-24	2	10	21	Araneae	Agelenidae	Draconarius		1	0.0656	0.0604	0.0052
2	2013-12-05	2	2	42	Hymenoptera	Formicidae			1	0.0386	0.0377	0.0009
2	2013-12-05	2	2	42	Araneae	Sparassidae	Heteropoda		3	0.0655	0.0446	0.0209
2	2013-12-05	2	2	42	Araneae	Agelenidae	Draconarius		2	0.0775	0.0657	0.0118
2	2013-12-05	2	2	42	Araneae	Agelenidae	Draconarius		1	0.0605	0.0563	0.0042
2	2013-12-05	2	2	22	Blattodea				4	0.0781	0.0619	0.0162
2	2013-12-05	2	2	22	Araneae	Lycosidae	Pardosa sumatrana		1	0.007	0.0058	0.0012
2	2013-12-05	2	2	15	Blattodea				2	0.0532	0.0491	0.0041
2	2013-12-05	2	2	15	Araneae	Sparassidae	Heteropoda		2	0.0818	0.0426	0.0392
2	2013-12-18	2	2	18	Blattodea				10	0.0975	0.0475	0.05
2	2013-12-18	2	2	14	Hymenoptera	Formicidae			1	0.031	0.0307	0.0003
2	2014-01-10	2	2	25	Blattodea				4	0.0715	0.0525	0.019
2	2014-01-10	2	2	25	Coleoptera (larvae)	Silphidae			1	0.0379	0.0371	0.0008
2	2014-01-10	2	2	10	Blattodea				1	0.0459	0.0402	0.0057
2	2014-01-10	2	2	10	Hymenoptera	Formicidae			1	0.0708	0.0639	0.0069
2	2014-01-10	2	2	10	Lepidoptera (larvae)				1	0.0433	0.0431	0.0002
2	2013-12-18	2	5	18	Araneae	Salticidae	Spider 6		1	0.0715	0.0704	0.0011
2	2013-12-18	2	5	18	Araneae	Sparassidae	Spider 14		1	0.0748	0.0731	0.0017
2	2014-01-10	2	2	10	Orthoptera	Tetragidae			1	0.0839	0.082	0.0019
2	2014-01-10	2	2	10	Coleoptera	Staphylinidae			1	0.0521	0.0518	0.0003
2	2014-01-10	2	2	47	Opiliones	Phalangiidae			1	0.0678	0.067	0.0008
2	2014-01-29	2	2	5	Blattodea				2	0.0949	0.0787	0.0162
2	2014-01-29	2	2	5	Phasmatodea				1	0.3227	0.1919	0.1308
2	2014-01-29	2	2	5	Araneae	Sparassidae	Heteropoda		1	0.0828	0.0764	0.0064
2	2014-01-29	2	2	5	Araneae	Agelenidae	Draconarius		1	0.074	0.0661	0.0079
2	2014-01-29	2	2	26	Araneae	Agelenidae	Draconarius		1	0.0762	0.0728	0.0034
2	2014-01-29	2	2	26	Blattodea				2	0.0759	0.067	0.0089
2	2014-01-29	2	2	42	Araneae	Sparassidae	Heteropoda		2	0.2432	0.1734	0.0698
2	2014-01-29	2	2	42	Chilopoda				1	0.0338	0.0298	0.004
2	2014-02-24	2	2	7	Blattodea				3	0.0449	0.0318	0.0131
2	2014-02-24	2	2	7	Araneae	Sparassidae	Heteropoda		1	0.0663	0.0431	0.0232
2	2014-02-24	2	2	7	Orthoptera	Gryllidae			2	0.1167	0.0865	0.0302
2	2014-02-24	2	2	7	Coleoptera (larvae)	Dastisidae			1	0.0409	0.0369	0.004
2	2014-02-24	2	2	23	Blattodea				1	0.0462	0.0402	0.006
2	2014-02-24	2	2	39	Blattodea				1	0.0386	0.0319	0.0067
2	2014-02-24	2	2	39	Isoptera				1	0.0482	0.0399	0.0083
2	2014-02-24	2	2	39	Araneae	Sparassidae	Heteropoda		1	0.0909	0.0766	0.0143
2	2014-02-24	2	2	39	Araneae	Agelenidae	Draconarius		1	0.0428	0.0385	0.0043
2	2013-12-05	2	5	26	Isopoda				3	0.0451	0.0419	0.0032
2	2013-12-05	2	5	26	Hymenoptera	Formicidae			1	0.0448	0.0398	0.005
2	2013-12-05	2	5	26	Diplopoda				1	0.0807	0.077	0.0037
2	2013-12-05	2	5	26	Chilopoda				2	0.0563	0.0486	0.0077
2	2013-12-05	2	5	26	Araneae	Sparassidae	Heteropoda		2	0.0509	0.043	0.0079
2	2013-12-05	2	5	26	Araneae	Agelenidae	Draconarius		7	0.0368	0.0244	0.0124
2	2013-12-05	2	5	26	Araneae	Agelenidae	Draconarius		1	0.0748	0.071	0.0038
2	2013-12-05	2	5	26	Araneae	Salticidae	Spider 2		1	0.0849	0.0812	0.0037
2	2013-12-05	2	5	26	Araneae	Salticidae	Spider 6		1	0.0628	0.0615	0.0013
2	2013-12-05	2	5	49	Blattodea				5	0.0666	0.0426	0.024
2	2013-12-05	2	5	49	Chilopoda				1	0.0459	0.0413	0.0046
2	2013-12-05	2	5	49	Araneae	Theridiiae	Spider 40		1	0.0547	0.0532	0.0015
2	2013-12-05	2	5	49	Araneae	Agelenidae	Draconarius		1	0.0374	0.0336	0.0038
2	2013-12-05	2	5	49	Araneae	Agelenidae	Draconarius		1	0.0338	0.0312	0.0026
2	2013-12-05	2	5	2	Isopoda				4	0.0738	0.0592	0.0146
2	2013-12-05	2	5	2	Heteroptera				2	0.0535	0.0417	0.0118
2	2013-12-05	2	5	2	Blattodea				1	0.076	0.0667	0.0093
2	2013-12-05	2	5	2	Hymenoptera	Formicidae			1	0.0554	0.0548	0.0006
2	2013-12-05	2	5	2	Orthoptera	Acrididae			1	0.072	0.0567	0.0153
2	2013-12-05	2	5	2	Araneae	Gnaphosidae	Spider 52		1	0.0631	0.0614	0.0017
2	2013-12-05	2	5	2	Araneae	Agelenidae	Draconarius		2	0.0569	0.0478	0.0091
2	2013-12-05	2	5	2	Araneae	Lycosidae	Spider 23		1	0.0463	0.0459	0.0004
2	2013-12-18	2	5	12	Ephemeroptera				1	0.045	0.0404	0.0046
2	2013-12-18	2	5	12	Heteroptera				2	0.061	0.0513	0.0097
2	2013-12-18	2	5	12	Coleoptera	Cuculionidae			1	0.0432	0.0421	0.0011
2	2013-12-18	2	5	12	Araneae	Sparassidae	Heteropoda		2	0.0408	0.0401	0.0007
2	2013-12-18	2	5	12	Araneae	Agelenidae	Draconarius		1	0.034	0.0322	0.0018
2	2013-12-18	2	5	12	Araneae	Amaurobiidae	Spider 42		1	0.0567	0.0552	0.0015
2	2013-12-18	2	5	12	Araneae	Theridiiae	Spider 15		1	0.0736	0.0729	0.0007
2	2013-12-18	2	5	18	Orthoptera	Gryllidae			1	0.0737	0.0668	0.0069
2	2013-12-18	2	5	18	Amphipoda				2	0.0552	0.0521	0.0031
2	2013-12-18	2	5	18	Hymenoptera	Formicidae			1	0.047	0.0469	0.0001
2	2013-12-18	2	5	18	Araneae	Sparassidae	Heteropoda		1	0.0544	0.0486	0.0058
2	2014-01-10	2	5	5	Orthoptera	Gryllidae			1	0.0517	0.0446	0.0071
2	2014-01-10	2	5	5	Collembola				6	0.0441	0.0434	0.0007
2	2014-01-10	2	5	5	Hymenoptera	Formicidae			2	0.0601	0.0564	0.0037
2	2014-01-10	2	5	5	Isoptera				1	0.0423	0.0416	0.0007
2	2014-01-10	2	5	24	Hymenoptera	Formicidae			2	0.0423	0.0393	0.003
2	2014-01-10	2	5	24	Coleoptera (larvae)	Lampyridae			1	0.058	0.0564	0.0016
2	2014-01-10	2	5	24	Blattodea				2	0.0558	0.0551	0.0007
2	2014-01-10	2	5	24	Isoptera				1	0.0492	0.0485	0.0007
2	2014-01-10	2	5	24	Araneae	Sparassidae	Heteropoda		1	0.0693	0.0569	0.0124
2	2014-01-10	2	5	24	Araneae	Theridiiae	Spider 60		2	0.338	0.0299	0.3081
2	2014-01-10	2	5	24	Araneae	Agelenidae	Draconarius		1	0.0485	0.0442	0.0043
2	2014-01-10	2	5	24	Araneae	Agelenidae	Draconarius		5	0.0309	0.0263	0.0046
2	2014-01-10	2	10	12	Araneae	Salticidae	Spider 18		1	0.0675	0.065	0.0025
2	2014-01-10	2	5	43	Hymenoptera	Formicidae			2	0.0522	0.0448	0.0074
2	2014-01-10	2	5	43	Blattodea				3	0.0668	0.0594	0.0074
2	2014-01-10	2	5	43	Coleoptera	Cuculionidae			1	0.0475	0.0393	0.0082
2	2014-01-10	2	5	43	Araneae	Sparassidae	Heteropoda		1	0.0908	0.0672	0.0236
2	2014-01-29	2	5	20	Dermaptera				1	0.1021	0.0628	0.0393
2	2014-01-29	2	5	20	Chilopoda				1	0.0915	0.086	0.0055
2	2014-01-29	2	5	20	Coleoptera (larvae)	Coccinellidae			1	0.0348	0.0312	0.0036
2	2014-01-29	2	5	20	Hymenoptera	Formicidae			3	0.0976	0.0891	0.0085
2	2014-01-29	2	5	20	Isoptera				4	0.0373	0.0282	0.0091
2	2014-01-29	2	5	20	Isopoda				1	0.034	0.033	0.001
2	2014-01-29	2	5	20	Collembola				2	0.0275	0.027	0.0005
2	2014-01-29	2	5	20	Araneae	Agelenidae	Draconarius		1	0.0632	0.0632	0
2	2014-01-29	2	5	20	Araneae	Amaurobiidae	Spider 25		3	0.0452	0.0417	0.0035
2	2014-01-29	2	5	47	Collembola				1	0.0246	0.0242	0.0004
2	2014-01-29	2	10	27	Araneae	Theridiiae	Spider 3		1	0.038	0.0338	0.0042
2	2014-01-29	2	5	9	Hymenoptera	Formicidae			2	0.0454	0.0411	0.0043
2	2014-01-29	2	5	9	Collembola				1	0.0394	0.039	0.0004
2	2014-01-29	2	5	9	Blattodea				1	0.0212	0.0195	0.0017
2	2014-01-29	2	5	9	Heteroptera				1	0.0333	0.0314	0.0019
2	2014-02-24	2	5	32	Blattodea				1	0.0261	0.0232	0.0029
2	2014-02-24	2	5	32	Lepidoptera (larvae)				1	0.0243	0.0223	0.002
2	2014-02-24	2	5	32	Araneae	Sparassidae	Heteropoda		1	0.0945	0.086	0.0085
2	2014-02-24	2	5	42	Araneae	Sparassidae	Heteropoda		2	0.1161	0.086	0.0301
2	2014-02-24	2	5	42	Orthoptera	Gryllidae			1	0.0988	0.0839	0.0149
2	2014-02-24	2	5	10	Hymenoptera	Formicidae			4	0.0713	0.0453	0.026
2	2014-02-24	2	5	10	Heteroptera				1	0.0244	0.0215	0.0029
2	2014-02-24	2	5	10	Araneae	Sparassidae	Heteropoda		1	0.0566	0.0445	0.0121
2	2014-02-24	2	5	10	Orthoptera	Gryllidae			2	0.034	0.0317	0.0023
2	2014-02-24	2	5	10	Chilopoda				2	0.0281	0.0249	0.0032
2	2013-12-18	2	0	20	Araneae	Sparassidae	Heteropoda		1	0.1409	0.083	0.0579
1	2013-10-02	2	2	26	Araneae	Agelenidae	Draconarius		2	0.088	0.0867	0.0013
1	2013-08-08	2	0	27	Araneae	Agelenidae	Draconarius		2	0.0332	0.0316	0.0016
2	2013-12-18	2	2	37	-							0
2	2013-12-18	2	5	41	-							0
2	2014-01-24	1	10	25	-							0
2	2014-02-24	2	0	14	-							0

## Sheet: Leaf litter and soil moisture
Date	Location	Transect	Quadrat	Weight of boat	Weight of boat+wet soil	Weight of boat+dry soil	Weight of wet soil	Weight of dry soil	Weight of water	Gravimetric soil water content	DW of Leaf Litter
2013-07-09	TPK	T0	3	2.5013	25.0786	20.3226	22.5773	17.8213	4.756	0.266872	3.88
2013-07-09	TPK	T0	4	2.4856	25.4977	21.112	23.0121	18.6264	4.3857	0.235456	4.05
2013-07-09	TPK	T0	15	2.4981	20.8505	16.8143	18.3524	14.3162	4.0362	0.281932	3.54
2013-07-09	TPK	T0	24	2.4925	21.4367	16.6412	18.9442	14.1487	4.7955	0.338936	1.79
2013-07-09	TPK	T0	36	2.5016	25.3502	20.4285	22.8486	17.9269	4.9217	0.274543	3.77
2013-07-22	TPK	T0	10	1.2392	35.7863	29.4324	34.5471	28.1932	6.3539	0.22537	4.26
2013-07-22	TPK	T0	14	1.2603	32.4199	25.5731	31.1596	24.3128	6.8468	0.281613	4.58
2013-07-22	TPK	T0	28	1.2541	46.4275	42.0618	45.1734	40.8077	4.3657	0.106982	3.88
2013-07-22	TPK	T0	36	1.2454	40.1616	37.4453	38.9162	36.1999	2.7163	0.0750361	6
2013-07-22	TPK	T0	50	1.2557	39.6491	34.1304	38.3934	32.8747	5.5187	0.167871	3.26
2013-08-19	TPK	T0	5	1.2565	30.1278	24.5132	28.8713	23.2567	5.6146	0.241419	12.85
2013-08-19	TPK	T0	16	1.2639	48.4806	39.2151	47.2167	37.9512	9.2655	0.244142	2.49
2013-08-19	TPK	T0	22	1.2453	36.631	32.9728	35.3857	31.7275	3.6582	0.115301	3.62
2013-08-19	TPK	T0	38	1.2458	21.8269	17.3344	20.5811	16.0886	4.4925	0.279235	18.44
2013-08-19	TPK	T0	47	1.2491	33.1831	30.0781	31.934	28.829	3.105	0.107704	1.61
2013-09-11	TPK	T0	9	1.25	29.5631	22.9276	28.3131	21.6776	6.6355	0.306099	3.04
2013-09-11	TPK	T0	12	1.2423	48.0457	41.6752	46.8034	40.4329	6.3705	0.157557	5.13
2013-09-11	TPK	T0	23	1.2563	53.5364	44.0164	52.2801	42.7601	9.52	0.222637	4.27
2013-09-11	TPK	T0	37	1.2527	33.112	27.3186	31.8593	26.0659	5.7934	0.22226	8.77
2013-09-11	TPK	T0	42	1.2511	28.0959	19.708	26.8448	18.4569	8.3879	0.454459	2.74
2013-09-27	TPK	T0	8	1.2392	41.17	34.1179	39.9308	32.8787	7.0521	0.214488	1.28
2013-09-27	TPK	T0	11	1.2526	43.4314	32.8193	42.1788	31.5667	10.6121	0.33618	12.24
2013-09-27	TPK	T0	30	1.2481	40.8585	37.0141	39.6104	35.766	3.8444	0.107488	3.93
2013-09-27	TPK	T0	39	1.2471	46.3965	43.4363	45.1494	42.1892	2.9602	0.0701649	1.47
2013-09-27	TPK	T0	43	1.2464	32.728	26.4104	31.4816	25.164	6.3176	0.251057	1.4
2013-07-09	TPK	T10	7	2.5085	22.0336	15.8761	19.5251	13.3676	6.1575	0.460629	182.72
2013-07-09	TPK	T10	12	2.4994	22.5265	13.4051	20.0271	10.9057	9.1214	0.836388	160.09
2013-07-09	TPK	T10	13	2.489	24.2693	15.8535	21.7803	13.3645	8.4158	0.629713	185.75
2013-07-22	TPK	T10	11	1.2507	25.7195	17.5956	24.4688	16.3449	8.1239	0.49703	149.46
2013-07-22	TPK	T10	25	1.253	32.3982	22.5895	31.1452	21.3365	9.8087	0.459715	101.6
2013-07-22	TPK	T10	48	1.2496	35.9786	25.6042	34.729	24.3546	10.3744	0.425973	749.73
2013-08-19	TPK	T10	14	1.2538	31.2336	19.5013	29.9798	18.2475	11.7323	0.642954	116.96
2013-08-19	TPK	T10	31	1.2509	22.4706	15.0575	21.2197	13.8066	7.4131	0.536924	133.21
2013-08-19	TPK	T10	50	1.2579	22.9482	14.8853	21.6903	13.6274	8.0629	0.591668	213.26
2013-09-11	TPK	T10	16	1.2596	30.0824	23.2416	28.8228	21.982	6.8408	0.3112	34.98
2013-09-11	TPK	T10	23	1.2532	35.4013	25.7744	34.1481	24.5212	9.6269	0.392595	60.23
2013-09-11	TPK	T10	38	1.245	18.911	14.2617	17.666	13.0167	4.6493	0.35718	192.26
2013-09-27	TPK	T10	6	-	-	-	-	-	-	-	72.94
2013-09-27	TPK	T10	34	1.2449	27.5644	21.8953	26.3195	20.6504	5.6691	0.274527	85.09
2013-09-27	TPK	T10	46	1.2475	34.2107	29.3107	32.9632	28.0632	4.9	0.174606	75.69
2013-07-09	TPK	T2	13	2.5074	18.717	14.5783	16.2096	12.0709	4.1387	0.342866	99.98
2013-07-09	TPK	T2	29	2.4924	22.5289	17.1691	20.0365	14.6767	5.3598	0.365191	43.25
2013-07-09	TPK	T2	43	2.4955	25.6357	21.2241	23.1402	18.7286	4.4116	0.235554	8.34
2013-07-22	TPK	T2	3	1.2525	24.1985	17.5624	22.946	16.3099	6.6361	0.406876	45.94
2013-07-22	TPK	T2	24	1.2437	26.6382	15.6637	25.3945	14.42	10.9745	0.761061	84.7
2013-07-22	TPK	T2	41	1.2464	25.5157	18.7309	24.2693	17.4845	6.7848	0.388047	12.18
2013-08-19	TPK	T2	12	1.2441	27.9604	19.4168	26.7163	18.1727	8.5436	0.470134	66.19
2013-08-19	TPK	T2	19	1.2552	31.7624	24.5431	30.5072	23.2879	7.2193	0.310002	52.64
2013-08-19	TPK	T2	31	1.2504	24.6383	18.6725	23.3879	17.4221	5.9658	0.342427	67.2
2013-09-11	TPK	T2	9	1.2552	34.6183	32.8625	33.3631	31.6073	1.7558	0.0555505	9.3
2013-09-11	TPK	T2	18	1.2544	23.1282	16.1378	21.8738	14.8834	6.9904	0.469678	100.48
2013-09-11	TPK	T2	33	1.2478	24.1942	20.8218	22.9464	19.574	3.3724	0.17229	5.64
2013-09-27	TPK	T2	11	1.2355	43.0662	33.5057	41.8307	32.2702	9.5605	0.296264	23.52
2013-09-27	TPK	T2	22	1.2544	22.5008	16.489	21.2464	15.2346	6.0118	0.394615	86.44
2013-09-27	TPK	T2	34	1.2608	28.0545	19.2354	26.7937	17.9746	8.8191	0.490642	23.73
2013-07-09	TPK	T5	6	2.4739	19.4924	13.9592	17.0185	11.4853	5.5332	0.481764	104.62
2013-07-09	TPK	T5	36	2.4999	22.7157	17.1935	20.2158	14.6936	5.5222	0.375823	203.34
2013-07-09	TPK	T5	46	2.4854	27.3502	20.7507	24.8648	18.2653	6.5995	0.361314	153.27
2013-07-22	TPK	T5	11	1.2421	21.9562	14.6351	20.7141	13.393	7.3211	0.546636	148.89
2013-07-22	TPK	T5	22	1.2471	32.355	22.9762	31.1079	21.7291	9.3788	0.431624	83.49
2013-07-22	TPK	T5	39	1.2483	33.6808	23.3373	32.4325	22.089	10.3435	0.468265	82.71
2013-08-19	TPK	T5	10	1.253	31.0668	20.7834	29.8138	19.5304	10.2834	0.526533	54.64
2013-08-19	TPK	T5	33	1.2526	31.2159	21.1484	29.9633	19.8958	10.0675	0.506011	77.2
2013-08-19	TPK	T5	41	1.2417	26.2295	18.8059	24.9878	17.5642	7.4236	0.422655	41.79
2013-09-11	TPK	T5	16	1.2436	32.0079	22.7716	30.7643	21.528	9.2363	0.429037	87.48
2013-09-11	TPK	T5	34	1.2622	29.244	21.2478	27.9818	19.9856	7.9962	0.400098	96.87
2013-09-11	TPK	T5	43	1.2488	26.6011	19.2274	25.3523	17.9786	7.3737	0.410138	63.28
2013-09-27	TPK	T5	2	1.2595	25.9929	20.8395	24.7334	19.58	5.1534	0.263197	89.29
2013-09-27	TPK	T5	24	1.2487	30.8959	27.7775	29.6472	26.5288	3.1184	0.117548	86.76
2013-09-27	TPK	T5	48	1.2539	29.5762	20.3163	28.3223	19.0624	9.2599	0.485768	145.56
2013-06-28	SM	T0	15				0	0	0	#DIV/0!	4.59
2013-06-28	SM	T0	9				0	0	0	#DIV/0!	2.37
2013-06-28	SM	T0	10				0	0	0	#DIV/0!	1.1
2013-06-28	SM	T0	38				0	0	0	#DIV/0!	1.02
2013-06-28	SM	T0	17				0	0	0	#DIV/0!	6.68
2013-07-18	SM	T0	5	1.2585	33.617	30.8904	32.3585	29.6319	2.7266	0.0920157	1.49
2013-07-18	SM	T0	9	1.2522	34.8445	32.8802	33.5923	31.628	1.9643	0.0621064	3.38
2013-07-18	SM	T0	19	1.2456	35.2218	31.4166	33.9762	30.171	3.8052	0.126121	4.49
2013-07-18	SM	T0	21	1.2492	33.57	30.8259	32.3208	29.5767	2.7441	0.0927791	3.27
2013-07-18	SM	T0	42	1.2433	37.0872	32.5142	35.8439	31.2709	4.573	0.146238	4.08
2013-08-08	SM	T0	4	1.2465	48.7518	35.3328	47.5053	34.0863	13.419	0.393677	6.98
2013-08-08	SM	T0	18	1.2394	39.2998	33.3468	38.0604	32.1074	5.953	0.185409	4.99
2013-08-08	SM	T0	27	1.2453	47.2186	43.7949	45.9733	42.5496	3.4237	0.0804637	2.75
2013-08-08	SM	T0	37	1.256	36.4092	33.5565	35.1532	32.3005	2.8527	0.0883175	4.1
2013-08-08	SM	T0	50	1.248	45.9767	36.8529	44.7287	35.6049	9.1238	0.256251	11.74
2013-08-26	SM	T0	7	1.246	49.5975	42.594	48.3515	41.348	7.0035	0.169379	4.06
2013-08-26	SM	T0	11	1.2491	35.6341	28.8358	34.385	27.5867	6.7983	0.246434	4.54
2013-08-26	SM	T0	28	1.2637	36.9339	33.8752	35.6702	32.6115	3.0587	0.0937921	5.28
2013-08-26	SM	T0	31	1.2525	41.461	34.2763	40.2085	33.0238	7.1847	0.217561	8.24
2013-08-26	SM	T0	48	1.2478	31.6797	27.8133	30.4319	26.5655	3.8664	0.145542	1.03
2013-09-12	SM	T0	8	1.2549	44.922	43.1821	43.6671	41.9272	1.7399	0.0414981	5.4
2013-09-12	SM	T0	16	1.2606	42.1543	39.0312	40.8937	37.7706	3.1231	0.082686	6
2013-09-12	SM	T0	25	1.2352	26.2065	23.1075	24.9713	21.8723	3.099	0.141686	4.03
2013-09-12	SM	T0	33	1.245	34.6065	31.8503	33.3615	30.6053	2.7562	0.0900563	9.2
2013-09-12	SM	T0	47	1.2443	44.6709	41.5945	43.4266	40.3502	3.0764	0.0762425	3.58
2013-10-02	SM	T0	3	1.2609	40.4399	36.2069	39.179	34.946	4.233	0.12113	5.68
2013-10-02	SM	T0	13	1.2536	49.58	46.3527	48.3264	45.0991	3.2273	0.0715602	5.52
2013-10-02	SM	T0	30	1.2556	53.4479	48.9006	52.1923	47.645	4.5473	0.0954413	5.47
2013-10-02	SM	T0	40	1.241	48.7427	42.7723	47.5017	41.5313	5.9704	0.143757	3.35
2013-10-02	SM	T0	41	1.2588	53.0994	45.9616	51.8406	44.7028	7.1378	0.159672	3.66
2013-06-28	SM	T10	20				0	0	0	#DIV/0!	43.74
2013-06-28	SM	T10	15				0	0	0	#DIV/0!	46.77
2013-06-28	SM	T10	22				0	0	0	#DIV/0!	40.73
2013-07-18	SM	T10	19	1.2524	25.006	19.2015	23.7536	17.9491	5.8045	0.323387	18.15
2013-07-18	SM	T10	21	1.2473	19.1336	14.3653	17.8863	13.118	4.7683	0.363493	37.98
2013-07-18	SM	T10	42	1.2538	21.4751	15.9603	20.2213	14.7065	5.5148	0.374991
2013-08-08	SM	T10	17	1.245	32.656	24.6249	31.411	23.3799	8.0311	0.343504	61.37
2013-08-08	SM	T10	33	1.2543	28.5898	21.1192	27.3355	19.8649	7.4706	0.37607	30.97
2013-08-08	SM	T10	42	1.2543	26.7226	18.416	25.4683	17.1617	8.3066	0.48402	31.51
2013-08-26	SM	T10	25	1.2581	35.8354	25.2885	34.5773	24.0304	10.5469	0.438898	46.37
2013-08-26	SM	T10	30	1.2438	30.7573	22.8555	29.5135	21.6117	7.9018	0.365626	35.13
2013-08-26	SM	T10	43	1.2509	26.9106	18.0998	25.6597	16.8489	8.8108	0.52293	12.4
2013-09-12	SM	T10	4	1.2354	28.2507	22.1008	27.0153	20.8654	6.1499	0.294742	57.74
2013-09-12	SM	T10	27	1.2528	33.8529	26.9173	32.6001	25.6645	6.9356	0.270241	67.49
2013-09-12	SM	T10	39	1.2538	37.8632	28.5838	36.6094	27.33	9.2794	0.339532	41.46
2013-10-02	SM	T10	1	1.2543	38.2073	24.4728	36.953	23.2185	13.7345	0.591533	99.26
2013-10-02	SM	T10	29	1.2437	29.4895	23.3185	28.2458	22.0748	6.171	0.27955	45.92
2013-10-02	SM	T10	38	1.2535	31.8554	23.9599	30.6019	22.7064	7.8955	0.347721	156.89
2013-06-28	SM	T2	36				0	0	0	#DIV/0!	14.62
2013-06-28	SM	T2	18				0	0	0	#DIV/0!	8.8
2013-06-28	SM	T2	50				0	0	0	#DIV/0!	1.43
2013-07-18	SM	T2	19	1.2389	31.9298	29.8583	30.6909	28.6194	2.0715	0.072381	4.52
2013-07-18	SM	T2	21	1.2462	29.2597	27.0872	28.0135	25.841	2.1725	0.0840718	6.82
2013-07-18	SM	T2	42	1.245	30.0114	24.3619	28.7664	23.1169	5.6495	0.244388	14.01
2013-08-08	SM	T2	8	1.2525	43.516	40.9011	42.2635	39.6486	2.6149	0.0659519	4.68
2013-08-08	SM	T2	23	1.2414	47.156	44.2315	45.9146	42.9901	2.9245	0.0680273	5.94
2013-08-08	SM	T2	38	1.2473	50.4074	46.9608	49.1601	45.7135	3.4466	0.0753957	3.51
2013-08-26	SM	T2	17	1.2452	44.6399	42.477	43.3947	41.2318	2.1629	0.0524571	8.8
2013-08-26	SM	T2	31	1.2555	37.8877	35.6011	36.6322	34.3456	2.2866	0.0665762	8.88
2013-08-26	SM	T2	49	1.2442	36.4898	33.4936	35.2456	32.2494	2.9962	0.0929072	5.91
2013-09-12	SM	T2	6	1.2389	59.6769	57.4924	58.438	56.2535	2.1845	0.0388331	8.95
2013-09-12	SM	T2	27	1.2467	48.3612	46.8815	47.1145	45.6348	1.4797	0.0324248	8.3
2013-09-12	SM	T2	42	1.2452	42.7828	39.0877	41.5376	37.8425	3.6951	0.0976442	8.25
2013-10-02	SM	T2	15	1.2623	54.2357	52.7766	52.9734	51.5143	1.4591	0.0283242	5.78
2013-10-02	SM	T2	26	1.2455	39.8368	37.7336	38.5913	36.4881	2.1032	0.0576407	11
2013-10-02	SM	T2	47	1.2455	51.7308	48.614	50.4853	47.3685	3.1168	0.065799	4.41
2013-06-28	SM	T5	4				0	0	0	#DIV/0!	12.45
2013-06-28	SM	T5	38				0	0	0	#DIV/0!	103.99
2013-06-28	SM	T5	0				0	0	0	#DIV/0!	43.04
2013-07-18	SM	T5	19	1.2551	27.7205	21.8074	26.4654	20.5523	5.9131	0.28771	7.69
2013-07-18	SM	T5	21	1.2481	21.8898	17.8002	20.6417	16.5521	4.0896	0.247074	66.96
2013-07-18	SM	T5	42	1.2404	33.3014	25.7702	32.061	24.5298	7.5312	0.307022	109.65
2013-08-08	SM	T5	17	1.2647	34.2048	27.8288	32.9401	26.5641	6.376	0.240023	77.7
2013-08-08	SM	T5	23	1.2489	33.9947	26.7291	32.7458	25.4802	7.2656	0.285147	75.04
2013-08-08	SM	T5	33	1.2505	34.9365	25.0782	33.686	23.8277	9.8583	0.413733	66.84
2013-08-26	SM	T5	13	1.2531	32.1391	26.5831	30.886	25.33	5.556	0.219345	18.53
2013-08-26	SM	T5	22	1.2565	30.6585	25.4053	29.402	24.1488	5.2532	0.217535	29.53
2013-08-26	SM	T5	46	1.2542	27.6915	21.0996	26.4373	19.8454	6.5919	0.332163	45.96
2013-09-12	SM	T5	7	1.2477	29.6551	25.4625	28.4074	24.2148	4.1926	0.173142	36.93
2013-09-12	SM	T5	45	1.253	23.1102	18.7587	21.8572	17.5057	4.3515	0.248576	37.23
2013-09-12	SM	T5	50	1.2471	30.8552	22.8544	29.6081	21.6073	8.0008	0.370282	31.83
2013-10-02	SM	T5	12	1.2476	33.5185	28.9407	32.2709	27.6931	4.5778	0.165305	116.39
2013-10-02	SM	T5	20	1.2573	43.5796	37.2159	42.3223	35.9586	6.3637	0.176973	49.6
2013-10-02	SM	T5	33	1.2362	38.5167	31.0261	37.2805	29.7899	7.4906	0.251448	85.53
2013-12-05	SM	T0	5	1.2451	47.3917	35.1194	46.1466	33.8743	12.2723	0.362289	20.16
2013-12-05	SM	T0	11	1.2532	51.9521	50.2228	50.6989	48.9696	1.7293	0.0353137	41.96
2013-12-05	SM	T0	21	1.2457	40.9539	37.8122	39.7082	36.5665	3.1417	0.0859174	35.26
2013-12-05	SM	T0	35	1.2617	42.5803	39.9719	41.3186	38.7102	2.6084	0.0673828	8.14
2013-12-05	SM	T0	46	1.2541	42.5816	39.8652	41.3275	38.6111	2.7164	0.0703528	16.4
2013-12-18	SM	T0	7	1.2537	34.5608	25.098	33.3071	23.8443	9.4628	0.396858	23.86
2013-12-18	SM	T0	20	1.2572	31.115	28.7921	29.8578	27.5349	2.3229	0.084362	15.93
2013-12-18	SM	T0	28	1.2531	30.6585	27.8506	29.4054	26.5975	2.8079	0.10557	10.74
2013-12-18	SM	T0	38	1.2676	34.9605	30.241	33.6929	28.9734	4.7195	0.162891	16.64
2013-12-18	SM	T0	41	1.2661	29.7609	28.317	28.4948	27.0509	1.4439	0.0533772	11.9
2014-01-10	SM	T0	6	1.255	29.2648	21.9576	28.0098	20.7026	7.3072	0.35296	42.87
2014-01-10	SM	T0	15	1.2461	25.132	20.7132	23.8859	19.4671	4.4188	0.226988	23.6
2014-01-10	SM	T0	27	1.2472	34.3658	30.5699	33.1186	29.3227	3.7959	0.129453	59.92
2014-01-10	SM	T0	36	1.2402	25.1992	21.7389	23.959	20.4987	3.4603	0.168806	6.72
2014-01-10	SM	T0	49	1.2563	22.6234	19.7563	21.3671	18.5	2.8671	0.154978	11.25
2014-01-29	SM	T0	3	1.2618	19.0968	17.0223	17.835	15.7605	2.0745	0.131627	34.34
2014-01-29	SM	T0	13	1.2366	29.8267	24.4168	28.5901	23.1802	5.4099	0.233385	33.88
2014-01-29	SM	T0	25	1.2631	31.073	28.2068	29.8099	26.9437	2.8662	0.106377	18.68
2014-01-29	SM	T0	31	1.2705	27.1107	22.7685	25.8402	21.498	4.3422	0.201982	6.54
2014-01-29	SM	T0	48	1.2534	44.1642	42.309	42.9108	41.0556	1.8552	0.0451875	32.33
2014-02-24	SM	T0	9	1.2535	28.4762	25.6766	27.2227	24.4231	2.7996	0.114629	54.09
2014-02-24	SM	T0	14	1.252	34.4286	30.1708	33.1766	28.9188	4.2578	0.147233	49.83
2014-02-24	SM	T0	25	1.2525	28.9468	26.2399	27.6943	24.9874	2.7069	0.108331	2.94
2014-02-24	SM	T0	32	1.2534	43.1903	40.6763	41.9369	39.4229	2.514	0.06377	8.47
2014-02-24	SM	T0	45	1.2548	31.1975	27.5024	29.9427	26.2476	3.6951	0.140779	16.68
2013-12-05	SM	T10	6	1.2484	31.412	27.0346	30.1636	25.7862	4.3774	0.169757	97.42
2013-12-05	SM	T10	31	1.2427	26.2047	24.052	24.962	22.8093	2.1527	0.0943782	75.38
2013-12-05	SM	T10	49	1.2543	38.534	37.2009	37.2797	35.9466	1.3331	0.0370856	19.15
2013-12-18	SM	T10	17	1.2526	20.7994	16.4073	19.5468	15.1547	4.3921	0.289818	91.13
2013-12-18	SM	T10	33	1.245	19.647	15.5912	18.402	14.3462	4.0558	0.282709	110.16
2013-12-18	SM	T10	41	1.2574	31.0952	25.7091	29.8378	24.4517	5.3861	0.220275	48.3
2014-01-10	SM	T10	12	1.2533	23.8173	19.0219	22.564	17.7686	4.7954	0.269881	120.52
2014-01-10	SM	T10	29	1.245	27.8665	23.8733	26.6215	22.6283	3.9932	0.176469	98.27
2014-01-10	SM	T10	38	1.2612	23.0504	20.5072	21.7892	19.246	2.5432	0.132142	87.42
2014-01-29	SM	T10	5	1.2618	31.098	28.6028	29.8362	27.341	2.4952	0.0912622	91.13
2014-01-29	SM	T10	27	1.2535	29.872	26.4042	28.6185	25.1507	3.4678	0.137881	85.42
2014-01-29	SM	T10	40	1.2408	23.9506	22.3828	22.7098	21.142	1.5678	0.0741557	65.75
2014-02-24	SM	T10	2	1.2581	21.4539	18.0414	20.1958	16.7833	3.4125	0.203327	101.82
2014-02-24	SM	T10	21	1.2409	20.2462	17.9981	19.0053	16.7572	2.2481	0.134157	131.35
2014-02-24	SM	T10	47	1.2612	33.0075	31.7129	31.7463	30.4517	1.2946	0.0425132	49.98
2013-12-05	SM	T2	15	1.2553	50.3767	49.9165	49.1214	48.6612	0.4602	0.00945723	24.74
2013-12-05	SM	T2	22	1.2516	54.2865	53.2487	53.0349	51.9971	1.0378	0.0199588	13.91
2013-12-05	SM	T2	42	1.2584	46.0192	44.8882	44.7608	43.6298	1.131	0.0259226	24.31
2013-12-18	SM	T2	14	1.2447	43.4926	41.6316	42.2479	40.3869	1.861	0.0460793	18.49
2013-12-18	SM	T2	18	1.2594	34.4476	33.9502	33.1882	32.6908	0.4974	0.0152153	22.22
2013-12-18	SM	T2	37	1.2479	35.0674	33.2206	33.8195	31.9727	1.8468	0.0577618	27.72
2014-01-10	SM	T2	10	1.2574	41.5818	40.4695	40.3244	39.2121	1.1123	0.0283662	36.34
2014-01-10	SM	T2	25	1.2552	43.9608	43.1689	42.7056	41.9137	0.7919	0.0188936	16.13
2014-01-10	SM	T2	47	1.263	43.5792	42.7215	42.3162	41.4585	0.8577	0.0206882	34.35
2014-01-29	SM	T2	5	1.2598	35.7697	35.5098	34.5099	34.25	0.2599	0.00758832	25.03
2014-01-29	SM	T2	26	1.2602	40.9883	40.6148	39.7281	39.3546	0.3735	0.00949063	41.65
2014-01-29	SM	T2	42	1.2565	26.1255	23.3438	24.869	22.0873	2.7817	0.125941	16.21
2014-02-24	SM	T2	7	1.2477	37.696	35.8018	36.4483	34.5541	1.8942	0.0548184	28.69
2014-02-24	SM	T2	23	1.2371	39.1636	37.5313	37.9265	36.2942	1.6323	0.0449741	57.32
2014-02-24	SM	T2	39	1.2616	31.0408	28.7046	29.7792	27.443	2.3362	0.0851292	37.54
2013-12-05	SM	T5	2	1.2585	34.6884	31.0628	33.4299	29.8043	3.6256	0.121647	81
2013-12-05	SM	T5	26	1.253	37.6061	35.2209	36.3531	33.9679	2.3852	0.0702192	210.67
2013-12-05	SM	T5	49	1.2451	42.9022	43.0942	41.6571	41.8491	-0.192	-0.00458791	29.02
2013-12-18	SM	T5	12	1.2599	25.2762	22.9875	24.0163	21.7276	2.2887	0.105336	107.2
2013-12-18	SM	T5	18	1.2562	28.9078	24.8903	27.6516	23.6341	4.0175	0.169987	89.22
2013-12-18	SM	T5	41	1.2664	32.1319	29.6087	30.8655	28.3423	2.5232	0.0890259	36.39
2014-01-10	SM	T5	5	1.2497	33.1913	30.5253	31.9416	29.2756	2.666	0.0910656	64.25
2014-01-10	SM	T5	24	1.2561	28.9841	27.0864	27.728	25.8303	1.8977	0.073468	238.08
2014-01-10	SM	T5	43	1.2573	52.6977	51.6223	51.4404	50.365	1.0754	0.0213521	62.69
2014-01-29	SM	T5	9	1.2449	34.4136	33.5768	33.1687	32.3319	0.8368	0.0258816	126.35
2014-01-29	SM	T5	20	1.2563	33.1786	32.0851	31.9223	30.8288	1.0935	0.0354701	132.98
2014-01-29	SM	T5	47	1.2507	44.9456	44.4903	43.6949	43.2396	0.4553	0.0105297	30.54
2014-02-24	SM	T5	10	1.2584	20.1423	18.9948	18.8839	17.7364	1.1475	0.0646975	176.34
2014-02-24	SM	T5	32	1.2595	30.3218	28.879	29.0623	27.6195	1.4428	0.0522385	35.82
2014-02-24	SM	T5	42	1.2611	38.3549	37.3744	37.0938	36.1133	0.9805	0.0271507	32.22
2013-11-28	TPK	T0	5	1.255	49.8339	41.3756	48.5789	40.1206	8.4583	0.210822	35.87
2013-11-28	TPK	T0	14	1.2575	34.2558	28.9619	32.9983	27.7044	5.2939	0.191085	7.99
2013-11-28	TPK	T0	26	1.2469	29.5157	24.3252	28.2688	23.0783	5.1905	0.224908	15.25
2013-11-28	TPK	T0	31	1.2482	25.8725	21.8795	24.6243	20.6313	3.993	0.193541	33.67
2013-11-28	TPK	T0	42	1.2531	37.4994	35.1838	36.2463	33.9307	2.3156	0.068245	16.23
2013-12-12	TPK	T0	6	1.2465	33.0114	30.2185	31.7649	28.972	2.7929	0.0964	10.95
2013-12-12	TPK	T0	20	1.2576	34.7621	30.2391	33.5045	28.9815	4.523	0.156065	19.24
2013-12-12	TPK	T0	24	1.258	25.3789	18.6415	24.1209	17.3835	6.7374	0.387574	19.44
2013-12-12	TPK	T0	33	1.2578	34.392	30.1555	33.1342	28.8977	4.2365	0.146603	50.4
2013-12-12	TPK	T0	43	1.2451	20.7789	18.6271	19.5338	17.382	2.1518	0.123795	16.91
2013-12-27	TPK	T0	8	1.2457	38.5105	32.7446	37.2648	31.4989	5.7659	0.183051	6.76
2013-12-27	TPK	T0	18	1.236	40.0518	32.4659	38.8158	31.2299	7.5859	0.242905	115.29
2013-12-27	TPK	T0	22	1.2552	32.7413	23.8358	31.4861	22.5806	8.9055	0.394387	15.76
2013-12-27	TPK	T0	39	1.2614	40.0743	36.2343	38.8129	34.9729	3.84	0.109799	4.92
2013-12-27	TPK	T0	44	1.2585	36.8927	34.5396	35.6342	33.2811	2.3531	0.0707038	3.63
2014-01-09	TPK	T0	3	1.2564	33.5351	31.242	32.2787	29.9856	2.2931	0.0764734	7.33
2014-01-09	TPK	T0	12	1.2533	48.3973	42.9995	47.144	41.7462	5.3978	0.1293	4.88
2014-01-09	TPK	T0	25	-			#VALUE!	#VALUE!	#VALUE!	#VALUE!
2014-01-09	TPK	T0	36	1.2521	45.9171	37.742	44.665	36.4899	8.1751	0.224037	7.05
2014-01-09	TPK	T0	41	1.2601	28.6995	24.5484	27.4394	23.2883	4.1511	0.178248	20.1
2014-01-24	TPK	T0	10	1.2541	37.648	34.9765	36.3939	33.7224	2.6715	0.0792203	13.97
2014-01-24	TPK	T0	13	1.2565	34.1046	26.8053	32.8481	25.5488	7.2993	0.2857	7.77
2014-01-24	TPK	T0	29	1.2619	31.4467	28.9758	30.1848	27.7139	2.4709	0.0891574	41.94
2014-01-24	TPK	T0	40	1.2608	34.1767	31.9619	32.9159	30.7011	2.2148	0.0721407	40.14
2014-01-24	TPK	T0	47	1.2468	41.505	34.2355	40.2582	32.9887	7.2695	0.220363	11.55
2013-11-28	TPK	T10	16	1.2525	27.9909	22.2067	26.7384	20.9542	5.7842	0.27604	119.66
2013-11-28	TPK	T10	21	1.2458	32.9571	27.1583	31.7113	25.9125	5.7988	0.223784	180.53
2013-11-28	TPK	T10	36	1.2622	21.3406	15.7355	20.0784	14.4733	5.6051	0.387272	235.96
2013-12-12	TPK	T10	9	1.2539	28.6283	24.8715	27.3744	23.6176	3.7568	0.159068	41.75
2013-12-12	TPK	T10	18	1.2397	20.3608	16.3346	19.1211	15.0949	4.0262	0.266726	-
2013-12-12	TPK	T10	50	1.2457	10.4277	8.7209	9.182	7.4752	1.7068	0.228328	177.03
2013-12-27	TPK	T10	11	1.2645	16.991	11.4997	15.7265	10.2352	5.4913	0.536511	178.29
2013-12-27	TPK	T10	23	1.2512	29.3315	26.3853	28.0803	25.1341	2.9462	0.117219	129.27
2013-12-27	TPK	T10	42	1.2473	24.4128	20.429	23.1655	19.1817	3.9838	0.207688	272.7
2014-01-09	TPK	T10	1	1.2573	26.7315	24.5664	25.4742	23.3091	2.1651	0.0928865	227.81
2014-01-09	TPK	T10	30	1.2561	30.3416	26.9516	29.0855	25.6955	3.39	0.13193	129.31
2014-01-09	TPK	T10	44	1.2624	21.5154	18.3513	20.253	17.0889	3.1641	0.185155	374.78
2014-01-24	TPK	T10	12	1.2545	23.5716	19.3736	22.3171	18.1191	4.198	0.231689	204.82
2014-01-24	TPK	T10	25	1.2536	34.4884	30.0863	33.2348	28.8327	4.4021	0.152677	222.61
2014-01-24	TPK	T10	46	1.2532	20.6864	17.9669	19.4332	16.7137	2.7195	0.162711	204.4
2013-11-28	TPK	T2	7	1.2358	27.3551	23.4671	26.1193	22.2313	3.888	0.174889	41.16
2013-11-28	TPK	T2	24	1.2596	27.4737	21.8148	26.2141	20.5552	5.6589	0.275303	59.68
2013-11-28	TPK	T2	30	1.2568	28.4671	22.8055	27.2103	21.5487	5.6616	0.262735	22.81
2013-12-12	TPK	T2	12	1.2626	29.3062	28.756	28.0436	27.4934	0.5502	0.0200121	37.93
2013-12-12	TPK	T2	17	1.2513	28.577	25.6514	27.3257	24.4001	2.9256	0.119901	184.03
2013-12-12	TPK	T2	28	1.2556	26.671	24.0198	25.4154	22.7642	2.6512	0.116464	42.86
2013-12-27	TPK	T2	5	1.2524	37.3088	35.66	36.0564	34.4076	1.6488	0.0479196	70.15
2013-12-27	TPK	T2	16	1.2554	27.8577	23.4662	26.6023	22.2108	4.3915	0.197719	207.91
2013-12-27	TPK	T2	33	1.2487	26.4662	24.53	25.2175	23.2813	1.9362	0.0831655	52.36
2014-01-09	TPK	T2	2	1.2482	42.1351	41.7087	40.8869	40.4605	0.4264	0.0105387	167.86
2014-01-09	TPK	T2	18	1.2469	24.1789	22.2103	22.932	20.9634	1.9686	0.0939065	72.32
2014-01-09	TPK	T2	31	1.2883	25.7182	22.4823	24.4299	21.194	3.2359	0.15268	63.45
2014-01-24	TPK	T2	6	1.2595	29.1428	28.7975	27.8833	27.538	0.3453	0.012539	49.46
2014-01-24	TPK	T2	20	1.2551	26.1174	23.4	24.8623	22.1449	2.7174	0.12271	170.73
2014-01-24	TPK	T2	39	1.2511	25.6754	24.246	24.4243	22.9949	1.4294	0.0621616	88.41
2013-11-28	TPK	T5	10	-			#VALUE!	#VALUE!	#VALUE!	#VALUE!	163.37
2013-11-28	TPK	T5	22	-			#VALUE!	#VALUE!	#VALUE!	#VALUE!	81.8
2013-11-28	TPK	T5	43	1.2394	24.4001	17.3688	23.1607	16.1294	7.0313	0.435931	161.46
2013-12-12	TPK	T5	8	1.2479	22.7404	20.1681	21.4925	18.9202	2.5723	0.135955	182.74
2013-12-12	TPK	T5	26	1.2643	12.7109	10.5332	11.4466	9.2689	2.1777	0.234947	141.16
2013-12-12	TPK	T5	45	1.2585	19.7961	17.3393	18.5376	16.0808	2.4568	0.152778	229.1
2013-12-27	TPK	T5	13	1.2604	28.1049	24.8911	26.8445	23.6307	3.2138	0.136001	112.11
2013-12-27	TPK	T5	23	1.2533	23.0957	19.0632	21.8424	17.8099	4.0325	0.226419	235.44
2013-12-27	TPK	T5	48	1.2536	23.2342	18.2068	21.9806	16.9532	5.0274	0.296546	110.23
2014-01-09	TPK	T5	1	1.261	22.5934	20.0466	21.3324	18.7856	2.5468	0.135572	190.57
2014-01-09	TPK	T5	24	1.2591	29.3219	27.1907	28.0628	25.9316	2.1312	0.0821854	141.3
2014-01-09	TPK	T5	42	1.2523	27.7408	25.236	26.4885	23.9837	2.5048	0.104438	169.18
2014-01-24	TPK	T5	5	1.2576	27.711	24.1935	26.4534	22.9359	3.5175	0.153362	234.42
2014-01-24	TPK	T5	29	1.2483	17.1834	15.6913	15.9351	14.443	1.4921	0.10331	65.54
2014-01-24	TPK	T5	35	1.2755	15.7541	14.067	14.4786	12.7915	1.6871	0.131892	138.01
